# 1                    **Glycine receptor $\alpha$ 3K governs mobility and conductance of** 2                    **L/K splice variant heteropentamers**

3  
4                    Running title: Glycine receptor  $\alpha$ 3L/K heteropentamerization

5  
6                    Veerle Lemmens<sup>1,2,\*</sup>, Bart Thevelein<sup>1,\*</sup>, Svenja Kankowski<sup>3,4</sup>, Hideaki Mizuno<sup>5</sup>,  
7                    Jochen C. Meier<sup>4</sup>, Susana Rocha<sup>2</sup>, Bert Brône<sup>6</sup>, Jelle Hendrix<sup>1,2,#</sup>

8  
9                    <sup>1</sup> Dynamic Bioimaging Lab, Advanced Optical Microscopy Centre and Biomedical Research Institute,  
10                    UHasselt, B-3590 Diepenbeek, Belgium.

11                    <sup>2</sup> Molecular Imaging and Photonics, Chemistry Department, KU Leuven, B-3001 Heverlee, Belgium.

12                    <sup>3</sup> Institute of Neuroanatomy and Cell Biology, Hannover Medical School, D-30625 Hannover, Germany

13                    <sup>4</sup> Division Cell Physiology, Zoological Institute, Technical University Braunschweig, D-38106  
14                    Braunschweig, Germany.

15                    <sup>5</sup> Laboratory of Biomolecular Network Dynamics, Biochemistry, Molecular and Structural Biology  
16                    Division, Department of Chemistry, KU Leuven, B-3001 Heverlee, Belgium

17                    <sup>6</sup> Neurophysiology Lab, Biomedical Research Institute, UHasselt, B-3590 Diepenbeek, Belgium.

18                    \* These authors contributed equally.

19  
20                    # Correspondence:

21                    [Jelle.hendrix@uhasselt.be](mailto:Jelle.hendrix@uhasselt.be)

22                    Hasselt University

23                    Agoralaan C (BIOMED)

24                    B-3590 Diepenbeek

25                    Tel. +32 11 269213

26 **Summary**

27 The glycine receptor  $\alpha 3$  is key to the central nervous system's physiology and involved in chronic pain  
28 and epilepsy. In this paper, Lemmens et al. reveal and functionally characterize  $\alpha 3$  splice variant  
29 heteropentamerization via advanced single-molecule fluorescence image analysis.

30

31 **Abstract**

32 Glycine receptors (GlyRs) are ligand-gated pentameric chloride channels in the central nervous system.  
33 GlyR- $\alpha 3$  is a possible target for chronic pain treatment and temporal lobe epilepsy. Alternative splicing  
34 into K or L variants determines the subcellular fate and function of GlyR- $\alpha 3$ , yet it remains to be shown  
35 whether its different splice variants can functionally co-assemble, and what the properties of such  
36 heteropentamers would be. Here, we subjected GlyR- $\alpha 3$  to a combined fluorescence microscopy and  
37 electrophysiology analysis. We employ masked Pearson's and dual-color spatiotemporal correlation  
38 analysis to prove that GlyR- $\alpha 3$  splice variants heteropentamerize, adopting the mobility of the K  
39 variant. Fluorescence-based single-subunit counting experiments revealed a variable and  
40 concentration ratio dependent hetero-stoichiometry. Via single-channel on-cell patch clamp we show  
41 heteropentameric conductances resemble those of the  $\alpha 3K$  splice variant. Our data are compatible  
42 with a model where  $\alpha 3$  heteropentamerization fine-tunes mobility and activity of GlyR  $\alpha 3$  channels,  
43 which is important to understand and tackle  $\alpha 3$  related diseases.

44

45 **Keywords**

46 Glycine receptors, ligand gated ion channels, image correlation spectroscopy, single-molecule  
47 fluorescence, Pearson's correlation coefficient, subunit counting, protein co-assembly, diffusion,  
48 stoichiometry, electrophysiology, patch clamp.

49

50

51 **Declarations**

52 **Funding**

53 We acknowledge the UHasselt Advanced Optical Microscopy Centre (AOMC). Prof. Em. Marcel  
54 Ameloot, the Research Foundation Flanders (FWO, project G0H3716N) and the province of Limburg  
55 (Belgium) (tUL Impuls II) are acknowledged for funding the microscopy hardware. V. Lemmens is  
56 grateful for a doctoral scholarship from the UHasselt (17DOC11BOF) and KU Leuven (C14/16/053)  
57 Special Research Funds (BOF).

58

59 **Conflicts of interest / competing interests**

60 No conflicts of interest apply.

61

62 **Ethics approval**

63 Not applicable

64

65 **Availability of data and material**

66 All data and material are available upon request.

67

68 **Code availability**

69 Fluctuation imaging and co-localization analyses were performed in the software package PAM [71].  
70 The software is available as source code, requiring MATLAB to run, or as pre-compiled standalone  
71 distributions for Windows or MacOS at [http://www.cup.uni-](http://www.cup.uni-muenchen.de/pc/lamb/software/pam.html)  
72 [muenchen.de/pc/lamb/software/pam.html](http://www.cup.uni-muenchen.de/pc/lamb/software/pam.html) or hosted in Git repositories under  
73 <http://www.gitlab.com/PAM-PIE/PAM> and <http://www.gitlab.com/PAM-PIE/PAMcompiled>. A  
74 detailed user manual is available at <http://pam.readthedocs.io>.

75

76 **Author contributions**

77 Conceptualization Meier J.C., Brône B. and Hendrix J.; Investigation and formal analysis Lemmens V.  
78 and Thevelein B.; Software development Hendrix J.; Writing the original draft Lemmens V., Thevelein  
79 B and Hendrix, J.; Review and editing by all authors.

## 80 **Introduction**

81 Neuronal communication in the central nervous system (CNS) is fine-tuned via ionotropic channel  
82 proteins such as glycine receptors (GlyRs). Belonging to the family of pentameric ligand-gated ion  
83 channels (pLGICs), GlyRs help regulate motor coordination and sensory signal processing [1, 2]. In  
84 humans, GlyRs are expressed as one of three  $\alpha$  isoforms ( $\alpha$ 1-3) that heteropentamerize with the  $\beta$   
85 isoform if the latter is present. In this paper we focus on the  $\alpha$ 3 isoform of GlyR, which in the human  
86 body is found in the spinal cord's dorsal horn, the brain stem and the hippocampus[3] . In addition,  
87 high RNA levels were also found in the cerebral cortex, the amygdala and in the pituitary gland [4]. It  
88 is involved in temporal lobe epilepsy (TLE) [5-8] and, due to its crucial involvement in inflammatory  
89 pain perception, it is a major target for chronic pain treatment [9]. Because of its specific localization  
90 in the CNS, targeting  $\alpha$ 3 could lead to reduced side effects compared to other GlyR- $\alpha$  isoforms.

91 GlyR- $\alpha$ 3 is produced as one of two possible splice variants,  $\alpha$ 3K or  $\alpha$ 3L. Post-transcriptional exclusion  
92 of exon 8 from the GlyR- $\alpha$ 3 coding mRNA [3, 10-12] results in the  $\alpha$ 3K variant lacking 15 amino acids  
93 (TEFALEKFYRFSDT) in the large intracellular loop between transmembrane  $\alpha$ -helices TM3 and TM4  
94 (Fig. 1A). GlyR- $\alpha$ 3L is the predominant variant in a healthy brain, outweighing  $\alpha$ 3K approximately five-  
95 fold. Although both variants are always co-expressed in neurons, GlyR- $\alpha$ 3K primarily localizes  
96 somatodendritically [5, 6, 13, 14], while  $\alpha$ 3L mostly localizes at the presynapse due to interaction with  
97 vesicular trafficking factor SEC8 [6], where it stimulates neurotransmitter release [6, 15-17], similar to  
98 other presynaptic chloride channels. Finally, neuronal cells additionally co-expressing GlyR- $\beta$   
99 endogenously will also contain postsynaptic heteropentameric  $\alpha$ - $\beta$  GlyRs, due to interaction with the  
100 postsynaptic scaffold protein gephyrin [18, 19].

101 Previous reports have used fluorescence microscopy and electrophysiology to investigate the  
102 properties of homomeric GlyR- $\alpha$ 3. Apart from their overall subcellular localization, fluorescence  
103 fluctuation imaging and single-particle tracking revealed that in live cells both (immunostained HA-  
104 tagged) splice variants exhibited free and confined diffusion in the membrane. Both fast (diffusion  
105 constant  $D \sim 0.1 \mu\text{m}^2/\text{s}$ ) and slow-diffusing ( $D \sim 0.01 \mu\text{m}^2/\text{s}$ ) species could be observed for both variants,  
106 with slow and confined diffusion being more prevalent for  $\alpha$ 3L than  $\alpha$ 3K [20, 21]. Fluorescence imaging  
107 using primary spinal cord or hippocampal neurons, or HEK293 cell lines, also evidenced that  $\alpha$ 3L is  
108 more prone to clustering in the cell membrane [5, 22, 23]. This suggests a role for the insert in the  
109 intracellular loop in directly promoting pentamer-pentamer interactions, whether or not combined  
110 with linking to immobile submembranous components that enhance the clustering process. It has also  
111 been shown using cell culture based whole-cell patch clamp experiments that, overall,  $\alpha$ 3L expressing  
112 cells exhibit slower desensitization kinetics than  $\alpha$ 3K [3, 24]. The longer TM3-TM4 intracellular loop  
113 seems to confer a larger stability to the  $\alpha$ 3L variant leading to slower desensitization, an effect that  
114 clustering seems to undo [25]. Finally, main-state single-channel conductances of 63-105 pS were

115 observed for the  $\alpha$ 3L variant by different groups [25-29]. For the  $\alpha$ 3K variant, one group reported a  
116 similar conductance of 69 pS, suggesting the TM3-TM4 loop does not contribute to regulating the ion  
117 flux through the open channel [25].

118 Besides the molecular and functional differences of the  $\alpha$ 3 homomers described above, it is intriguing  
119 to know whether the two  $\alpha$ 3 splice variants can also form heteropentamers, and if they do, which  
120 effects this would have on GlyR function. Indeed, the pathological effect of the increased K-to-L  
121 expression ratio in TLE patients with a severe disease course hints to a functional direct interaction  
122 between the splice variants [5]. The existence of  $\alpha$ 3L/K heteropentamers in HEK293 cells was already  
123 suggested [22] via co-localization analysis of the differently labeled splice variants, although in this  
124 report the distinction between clusters of overlapping homopentamers or actual heteropentamers  
125 could not be made.

126 In this paper, we hypothesize that GlyR- $\alpha$ 3 K/L splice variants functionally interact in a cell-biological  
127 context. If so, we would like to know what the molecular and functional properties of such  
128 heteropentamers are. We first develop strategies for expressing and imaging single GlyR- $\alpha$ 3 pentamers  
129 in the membrane of live cells. We then use a combination of different quantitative fluorescence  
130 microscopy imaging and analysis methods including Pearson's co-localization, raster/temporal image  
131 correlation spectroscopy [30, 31] and subunit counting via stepwise photobleaching [32, 33] to  
132 investigate the mobility, heteropentamerization and heterostochiometry of co-expressed GlyR- $\alpha$ 3 K/L  
133 splice variants. Then, we subject GlyR- $\alpha$ 3 expressing cells to functional analysis via single-channel patch  
134 clamp. In the discussion section we integrate the results from the different types of experiments we  
135 performed and compare this with the present state of knowledge to better understand the cell-  
136 biological consequences of GlyR splice variant heteropentamerization.

137

138 **Results**

139 Advanced methodology for imaging single-pentamer properties of glycine receptors

140 Physiologically, GlyR- $\alpha$ 3 molecules are present both as single pentamers and clusters of pentamers. As  
 141 we were specifically interested in single pentamers, we first developed a cell-based fluorescent GlyR  
 142 expression system and an analysis methodology that allows specifically analyzing the molecular  
 143 properties of single GlyR- $\alpha$ 3 pentamers in a way that is unbiased by clusters. First, to visualize the  $\alpha$ 3L  
 144 and  $\alpha$ 3K isoforms of GlyR, we used plasmids encoding the GlyR N-terminally tagged with a green (eGFP)  
 145 or red (mCherry) fluorescent protein (FP) (Fig. 1A, Fig. S1E-G) and transiently transfected these in  
 146 HEK293 cells. These do not express GlyR endogenously but are known to be a relevant model system  
 147 for studying GlyRs [3]. Immunocytochemistry (Fig. S1) and whole-cell patch-clamp electrophysiology  
 148 (Fig. S2) confirmed a subcellular distribution and activity much like the endogenous situation,  
 149 respectively, of the FP-tagged receptor.

150

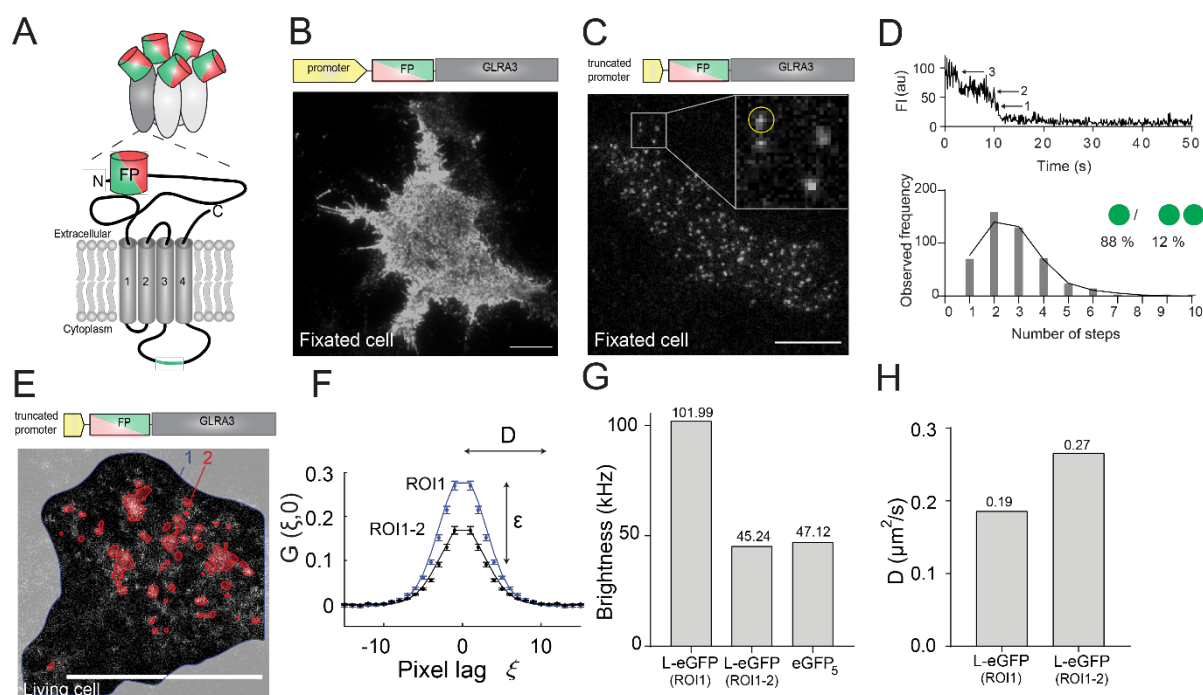

151

152 **Fig. 1: Low copy number imaging of GlyR- $\alpha$ 3L-FP in HEK293 cells allows quantifying single**  
 153 **pentamer properties.** A) Subunit structure of GlyR- $\alpha$ 3-FP with the fluorescent protein eGFP or  
 154 mCherry (FP) fused to the terminus of the extracellular N-terminal domain and the position of  
 155 the TM3-TM4 loop insert for GlyR- $\alpha$ 3L in green. B) Representative cell with high copy number  
 156 GlyR expression from a plasmid with a strong promoter. Scale bar, 10  $\mu\text{m}$ . C) Representative  
 157 fixed cell with low copy number GlyR expression using a plasmid with a truncated promoter.  
 158 Scale bar, 10  $\mu\text{m}$ . The inset is a magnification of the area indicated by the white square, white  
 159 spots indicate single receptors, the yellow circle corresponds to the data in the upper part of

160 panel D. D) Step-wise photobleaching subunit counting identify low numbers of fluorescent  
161 eGFP per fluorescent spot in the low copy number cells. E) Confocal fluorescence image of a live  
162 cell expressing GlyR used for RICS analysis. The edge of the cell is outlined in blue (region of  
163 interest, ROI1) and the high intensity clusters, automatically selected via frame-to-frame  
164 intensity thresholding (see Materials and Methods for more details), are highlighted in red  
165 (ROI2). Scale bar, 10  $\mu\text{m}$ . F) The 1D section of the average 2D RICS autocorrelation function (the  
166 reader is referred to Fig. S3A-B for images of the 2D correlation functions) at spatial lag  $(\xi, 0)$  of  
167 a confocal image series of GlyR- $\alpha$ 3L-eGFP expressing cells using either all pixels within ROI1 or  
168 within ROI1 minus ROI2. The reader is also referred to Video S1-2 for the different ROIs. The  
169 mean brightness  $\epsilon$  and mean diffusion coefficient are determined from the amplitude and shape  
170 of the correlation function, respectively. G) Representative example of the molecular brightness  
171 (in kphotons/second) of diffusing GlyR- $\alpha$ 3L-eGFP assemblies within ROI1 or within ROI1 minus  
172 ROI2, and, as a reference, molecular brightness of diffusing cytosolic eGFP<sub>5</sub> measured as close  
173 to the bottom membrane as possible. H) Representative example of the diffusion coefficient of  
174 diffusing GlyR- $\alpha$ 3L-eGFP within ROI1 or within ROI1 minus ROI2.

175

176 Then, we followed a three-pronged approach to achieve the required low (single-molecule) and  
177 intermediate (10-100 nM) expression levels that are ideally suited for the planned single-pentamer  
178 analyses and for the diffusion analysis, respectively. We truncated the CMV promotor (similar to [34]),  
179 reduced the amount of GlyR encoding plasmid DNA while retaining the transfection efficiency via  
180 co-transfection with a non-coding plasmid [35] and limited the time between transfection and fixation  
181 or live-cell imaging. Using total internal reflection fluorescence microscopy (TIRFM) we imaged fixated  
182 cells expressing the normal- or low-expressing GlyR- $\alpha$ 3L-eGFP plasmids (Fig. 1B-C). Indeed, with the  
183 latter plasmids we could easily find cells that clearly exhibited individual diffraction limited fluorescent  
184 spots (Fig. 1C), presumably single pentamers.

185 We next set out to prove whether these spots corresponded to single GlyR pentamers by recording  
186 time-lapse fluorescence images of transiently transfected cells and counting the number of eGFP  
187 molecules per diffraction-limited spot using single-spot photobleaching step measurements (Fig. 1D,  
188 top). As can be seen from the frequency distribution of the number of steps, a variety of bleaching  
189 steps ranging from 1 to 10 was observed (Fig. 1D, bottom). This has been observed before in bleaching  
190 experiments of GlyR- $\alpha$ 1 in HEK293 cells [32, 36] and is attributed to a mixture of incomplete maturation  
191 of the fluorescent proteins, prebleaching of the eGFP, and single pentamers that are overlapping at a  
192 spatial scale smaller than the optical resolution. To analyze the data quantitatively, we fitted the  
193 distribution to a binomial model (Eq. 1, see Materials and Methods). This analysis resulted in a  
194 probability of 47% for eGFP to be matured and unbleached and in 88% of spots not overlapping with

195 other spots. Both of these values are similar to previous experiments on GlyR- $\alpha$ 1 in HEK293 cells [32,  
196 36]. This experiment thus suggests that in the low-expressing HEK293 cells, about 88% of detected  
197 fluorescent spots were likely single pentamers.

198 Finally, to corroborate that the majority of GlyRs detected in the cell membrane were indeed single  
199 pentamers, we used confocal raster image correlation spectroscopy (RICS). Practically, we performed  
200 experiments in cells with intermediate expression levels of GlyR- $\alpha$ 3L-eGFP (ideally 10-100 nM [37])  
201 (Fig. 1E). In such cells, we observed both regions with diffuse fluorescence, as well as regions with high-  
202 intensity fluorescent clusters, the latter presumably being GlyR aggregates that have been observed  
203 before [20]. After spatial autocorrelation of the images (Eq. 5) and fitting the resulting data to Eq. 6,  
204 we obtained both the molecular brightness  $\epsilon$  (Eq. 7) and the mobility (diffusion constant,  $D$ ) of the GlyR  
205 complexes diffusing in the membrane (Fig. 1F). The  $\epsilon$  informs on the average number of fluorescing  
206 eGFP moieties in the diffusing complexes and, via comparison with a control protein, can be used to  
207 assess their average stoichiometry. The  $D$ , on the other hand, reports on the average size of these  
208 diffusing complexes, with slower diffusion indicative of larger complexes. When we included all pixels  
209 belonging to the cell membrane into the analysis (ROI1 in Fig. 1E, Fig. S3A and Video S1), the  $\epsilon$  that we  
210 measured was significantly higher than that of a control protein, a cytosolic tandem eGFP pentamer  
211 (eGFP5) that we measured as close to the cell membrane as possible (Fig. 1G). When we additionally  
212 excluded the regions with an intense fluorescence signal (ROI1 minus ROI2 in Fig. 1E, Fig. S3B and Video  
213 S2), the brightness  $\epsilon$  of the diffusing GlyR complexes was indistinguishable from that of the eGFP5  
214 control Fig. 1G. Additionally, this experiment seems to show that properties of single GlyR pentamers  
215 can be specifically studied, in the case of intermediate-expression cells, by masking out regions  
216 containing clusters. The observed diffusion constant also depended on the ROI that was selected for  
217 the RICS analysis. Indeed, diffusion analysis in 'ROI1 minus ROI2' resulted in overall increased mobility,  
218 which directly proves the masking procedure efficiently removed the high-stoichiometry GlyR clusters  
219 (Fig. 1H).

220 In summary, we generated HEK293 cells expressing low amounts of GlyR- $\alpha$ 3 splice variants labeled  
221 with fluorescent proteins and validated single-molecule and fluctuation imaging tools that allow  
222 focusing on the properties of single pentameric complexes excluding GlyR clusters. In the rest of the  
223 paper all analyses are performed on single GlyR pentamers, unless explicitly stated otherwise.  
224 Specifically, we take a closer look at the two splice variants, and at what happens when they are co-  
225 expressed in cells.

226



## 227 Single homopentameric K and L variants exhibit a different diffusion signature

228 As a follow-up of the work of Notelaers et al. [20, 21], we next investigated the mobility of the two  
 229 different splice variants GlyR- $\alpha$ 3L-eGFP and GlyR- $\alpha$ 3K-eGFP with RICS [38, 39] and temporal image  
 230 correlation spectroscopy (TICS) [40], using image masking to specifically focus on single pentamers.  
 231 RICS, which analyses  $\mu$ s-ms intensity fluctuations occurring within confocal image frames, is typically  
 232 used to quantify the mobility of faster protein populations ( $D \approx 0.1$ - $500 \mu\text{m}^2/\text{s}$ ) while TICS, in which  
 233 tens-of-milliseconds camera pixel intensity fluctuation are correlated over time, is typically used to  
 234 quantify the mobility of proteins diffusing on a relatively slow timescale ( $D \approx 0.001$ - $0.1 \mu\text{m}^2/\text{s}$ ). Parallel  
 235 application of both techniques allow identifying and characterizing different possible mobile protein  
 236 populations [41]. Essential to this is choosing imaging conditions suited to the type of diffusion process  
 237 (for RICS, see [42], for TICS, see [43]).

238 For RICS, we acquired confocal image series of living cells expressing either GlyR- $\alpha$ 3L-eGFP or GlyR-  
 239  $\alpha$ 3K-eGFP at  $37^\circ\text{C}$  as illustrated in Fig. 2A. Because in confocal microscopy the laser scans pixel per  
 240 pixel and line per line while proteins diffuse, the resulting image will contain spatial fluorescence  
 241 intensity fluctuations along any direction in the image, as depicted in Fig. 2B along the direction of a  
 242 single line scan. We spatially correlated each image frame in the series (Eq. 5) and via fitting of the  
 243 average spatial autocorrelation function (Fig. 2C-D, Eq. 6), we determined that the diffusion  
 244 coefficients  $D$  of GlyR- $\alpha$ 3L-eGFP ( $D = 0.26 \pm 0.11 \mu\text{m}^2/\text{s}$ ) and GlyR- $\alpha$ 3K-eGFP ( $D = 0.29 \pm 0.08 \mu\text{m}^2/\text{s}$ ) were  
 245 within experimental error the same (Fig. 2E). At least within the timescale of a single RICS image frame,  
 246 the K and L variants thus exhibit similar diffusion.

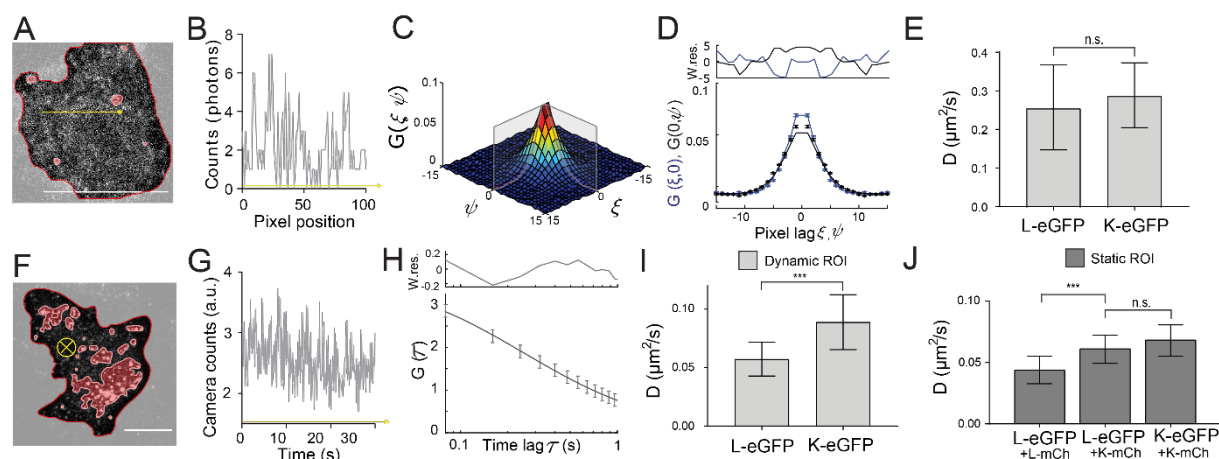

247  
 248 **Fig. 2: RICS and TICS evidence two diffusive subpopulations of single GlyR pentamers.** A)   
 249 Representative confocal microscopy image of the first frame from an image series of a HEK293   
 250 cell expressing GlyR- $\alpha$ 3L-eGFP. Frame-based intensity thresholding was used to remove GlyR   
 251 clusters and the extracellular region from the analysis. Scale bar  $10 \mu\text{m}$ . B) Photon count values   
 252 fluctuating along the yellow arrow in A. C) 3D autocorrelation with the grey outlining showing   
 253 the average  $(\xi, 0)$  and  $(0, \varphi)$  autocorrelation function. D) Average  $(\xi, 0)$  and  $(0, \varphi)$  autocorrelation

254 function and fit. Top graph displays the weighted residuals for the fit in the bottom graph. E)  
255 Average diffusion coefficient and standard deviation obtained via RICS for GlyR- $\alpha$ 3L-eGFP and  
256 GlyR- $\alpha$ 3K-eGFP. F) Representative TIRF microscopy image of the first frame from an image series  
257 of a HEK293 cell expressing GlyR- $\alpha$ 3L-eGFP. Frame-based intensity thresholding was applied to  
258 remove GlyR clusters (indicated in red) and the extracellular region (indicated in light gray). Scale  
259 bar 10  $\mu$ m. G) Camera count values fluctuating along the yellow arrow in F which is directed into  
260 the plane of the image to represent its direction through time. H) Average temporal  
261 autocorrelation function and fit. Top graph displays the weighted residuals for the fit in the  
262 bottom graph. I) The average diffusion coefficient and standard deviation obtained via TICS for  
263 single GlyR- $\alpha$ 3L-eGFP and GlyR- $\alpha$ 3K-eGFP. Here, a dynamic mask was used, calculated per frame,  
264 to omit both mobile and immobile GlyR clusters from the analysis. J) The average diffusion  
265 coefficient and standard deviation obtained via TICS for GlyR- $\alpha$ 3L-eGFP when co-expressed with  
266 GlyR- $\alpha$ 3K-mCh or GlyR- $\alpha$ 3L-mCh compared to co-expression of GlyR- $\alpha$ 3K-eGFP with GlyR- $\alpha$ 3K-  
267 mCh. Image masking was based on the average intensity of the time series, so only static clusters  
268 were removed. Error bars on the bar graphs represent the standard deviation from  $n = 9-22$   
269 different cell measurements (Table S1-2). \*\*\*  $p$ -value  $< 0.001$  obtained via an unpaired two  
270 sample  $t$ -test with unequal variance of the data.

271  
272 For TICS, time-lapse images were acquired using TIRF-based widefield microscopy in living cells at room  
273 temperature (Fig. 2F). As the frame rate using a camera is much faster than for confocal microscopy,  
274 and oftentimes similar to the time it takes molecules to diffuse in and out of image pixels, fluorescence  
275 intensities tend to fluctuate from frame to frame due to molecular diffusion, as illustrated in Fig. 2G.  
276 By temporally autocorrelating each pixel's fluorescence time trace (Eq. 10) and fitting a model to the  
277 obtained mean temporal autocorrelation function (Fig. 2H, Eq. 11), the diffusion coefficient can  
278 likewise be determined. In this way we obtained a diffusion coefficient of  $D = 0.089 \pm 0.023 \mu\text{m}^2/\text{s}$  for  
279 GlyR- $\alpha$ 3K-eGFP and a significantly lower diffusion coefficient of  $D = 0.057 \pm 0.014 \mu\text{m}^2/\text{s}$  for GlyR- $\alpha$ 3L-  
280 eGFP (Fig. 1I). First, this analysis reveals a second diffusive GlyR species, as values for  $D$  were  
281 significantly lower as observed with RICS, even when RICS measurement were performed at RT (Fig.  
282 S2F). More interestingly, however, the slower component of the L variant is significantly lower than  
283 the slow component of the K variant. To investigate the possibility that this could be related to  
284 inefficient removal of clusters from the analysis, which would affect the clustering-prone L variant  
285 more than the K variant, and thus also the observed mobility (Fig. S3C) [5, 22, 23], we performed a  
286 detailed comparison of different masking procedures (Fig. S3D). This showed a dependence of the  
287 observed  $D$  for both K and L on the type of mask used: whole cell (Video S3), static mask (Video S4,  
288 mask calculated on the average of all frames), dynamic mask (Video S5, calculated per frame), a

289 significantly slower diffusion of the L variant was always observed. In other words, when looking at  
 290 diffusing of single pentamers of GlyR- $\alpha$ 3 on the slow TICS timescale, the L variant exhibits a slower  
 291 mobility than the K variant.

292 Finally, we wanted to investigate whether co-expression of K would affect the mobility of L at the level  
 293 of pentamers. Practically, we co-expressed GlyR- $\alpha$ 3L-eGFP and the red mCherry FP-tagged version of  
 294 the short GlyR isoform (GlyR- $\alpha$ 3K-mCh) and performed single-color TICS on the acquired eGFP channel  
 295 image series. Interestingly, we observed an increased diffusion coefficient for GlyR- $\alpha$ 3L-eGFP in the  
 296 presence of GlyR- $\alpha$ 3K-mCh (Fig. 2J, Table S2,  $D = 0.061 \pm 0.01 \mu\text{m}^2/\text{s}$ ; the value is slightly different than  
 297 in Fig. 2I because of the different mask used) as compared to cells co-expressing GlyR- $\alpha$ 3L-eGFP and  
 298 GlyR- $\alpha$ 3L-mCh (Fig. 2J, Table S2,  $D = 0.044 \pm 0.01 \mu\text{m}^2/\text{s}$ ) or as compared to GlyR- $\alpha$ 3L-eGFP alone  
 299 (Fig. S3D, Table S2,  $D = 0.047 \pm 0.01 \mu\text{m}^2/\text{s}$ ). As expected, co-expression of GlyR- $\alpha$ 3K-eGFP and GlyR-  
 300  $\alpha$ 3K-mCh (Table S2,  $D = 0.068 \pm 0.01 \mu\text{m}^2/\text{s}$ ) did not affect the mobility of the former as compared to  
 301 GlyR- $\alpha$ 3K-eGFP alone (Table S2,  $D = 0.074 \pm 0.01 \mu\text{m}^2/\text{s}$ ). These results are strongly indicative of a direct  
 302 K-L interaction at the level of single pentamers, which we will investigate using dual-color imaging.

303

### 304 Co-localization and co-diffusion proves GlyR- $\alpha$ 3L/K heteropentamerization

305 To investigate whether GlyR heteropentamerization could be the cause of the increased mobility  
 306 observed for GlyR- $\alpha$ 3L-eGFP when co-expressed with GlyR- $\alpha$ 3K-mCherry in the membrane of HEK293  
 307 cells, we recorded dual-color images via alternating-excitation TIRF microscopy (Fig. 3A).

308

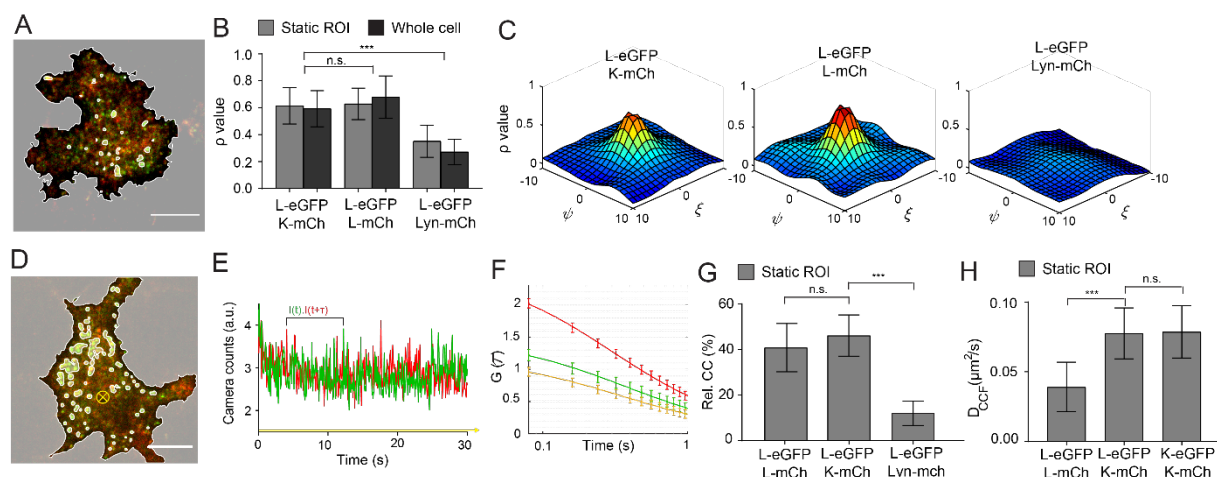

309

310 **Fig. 3: Co-localization and co-diffusion of GlyR- $\alpha$ 3 isoforms in HEK293 cells at single-molecule**  
 311 **expression confirms the presence of GlyR- $\alpha$ 3L/K heteropentamers.** A) Representative dual-  
 312 color TIRF image of a HEK293 cell co-expressing GlyR- $\alpha$ 3L-eGFP (green) and GlyR- $\alpha$ 3K-mCherry  
 313 (red). Using intensity thresholding over the average of the 5 first frames the cell membrane was  
 314 selected and bright regions containing GlyR clusters were omitted. Scale bar 10  $\mu\text{m}$ . B) Pearson's

315 correlation coefficient of cells expressing GlyR- $\alpha$ 3L-eGFP and GlyR- $\alpha$ 3K-mCherry and cells co-  
316 expressing GlyR- $\alpha$ 3L-eGFP and GlyR- $\alpha$ 3L-mCherry plasmids. Both experimental groups have  
317 significantly higher co-localization compared to the negative control with GlyR- $\alpha$ 3L-eGFP and  
318 Lyn-mCherry. The  $\rho$  values are shown for cells including (grey) and excluding (dark grey) GlyR  
319 clusters. C) Spatial  $\rho$  from representative cells expressing GlyR- $\alpha$ 3L-eGFP and GlyR- $\alpha$ 3K-mCherry  
320 (left), GlyR- $\alpha$ 3L-eGFP and GlyR- $\alpha$ 3L-mCherry (middle) or GlyR- $\alpha$ 3L-eGFP and Lyn-mCherry  
321 (right). D) Representative dual-color TIRF image of a HEK293 cell co-expressing GlyR- $\alpha$ 3L-eGFP  
322 (green) and GlyR- $\alpha$ 3K-mCherry (red). Intensity thresholding was applied over the average of the  
323 400 frames (static ROI) to remove GlyR clusters and the extracellular region. Scale bar 10  $\mu$ m. E)  
324 Dual-color fluorescence trace for one selected pixel over time (yellow arrow orthogonal to the  
325 image in D). F) Mean temporal autocorrelation (green and red) and cross-correlation (yellow) of  
326 all included pixels after intensity thresholding. Error bars are the 95% confidence intervals. G)  
327 The relative cross-correlation (Eq. 12) for cells expressing GlyR- $\alpha$ 3L-eGFP and GlyR- $\alpha$ 3K-  
328 mCherry, GlyR- $\alpha$ 3L-eGFP and GlyR- $\alpha$ 3L-mCherry plasmids, and the negative control with GlyR-  
329  $\alpha$ 3L-eGFP and Lyn-mCherry. H) Average diffusion coefficient and standard deviation obtained  
330 via TICC5 for cells co-expressing GlyR- $\alpha$ 3L-eGFP and GlyR- $\alpha$ 3K-mCh or GlyR- $\alpha$ 3L-mCh, or for cells  
331 co-expressing GlyR- $\alpha$ 3K-eGFP and GlyR- $\alpha$ 3K-mCh. Error bars represent the standard deviation  
332 from  $n = 5-22$  measurements (see Table S2-3 for  $n$ ). \*\*\*  $p$ -value  $< 0.001$  obtained via an  
333 unpaired two sample  $t$ -test with unequal variance of the data.

334  
335 To quantify the similarity of the two images and hence the colocalization of the two splice variants in  
336 the membrane, we calculated the Pearson's correlation coefficient  $\rho$  (Eq. 8). The  $\rho$  describes the  
337 degree of correlation between green and red channel pixel intensities of a dual-color image [44, 45].  
338 The values of  $\rho$  can range from 1 to -1, with 1 a perfect correlation, 0 when there is no correlation and  
339 -1 for when there is an inverse relationship (exclusion) between the images. The pixels included in the  
340 analysis were confined to the region of the cell membrane since the extracellular region holds pixels  
341 with both low green and red intensity values which falsely increases the  $\rho$  value [46]. In addition, when  
342 cells contained regions with clustering GlyRs, these regions were also omitted by static ROI intensity  
343 thresholding to ensure Pearson's analysis was performed only on the heteropentamer fraction. This  
344 revealed a positive Pearson's correlation coefficient calculated for images of cells co-expressing GlyR-  
345  $\alpha$ 3L and GlyR- $\alpha$ 3K, similar to the one calculated for cells co-expressing GlyR- $\alpha$ 3L labeled with eGFP and  
346 mCherry (Fig. 3B), and significantly higher than for the negative control cells co-expressing GlyR- $\alpha$ 3L-  
347 eGFP and the monomeric membrane protein Lyn-mCherry that does not interact with GlyR. To confirm  
348 that the Pearson's coefficient was indeed determined mainly by the fluorescent receptors, and less by  
349 cellular background,  $\rho$  was calculated as a function of the pixel shift between the images in the  $x$  and

350 y direction (Fig. 3C). For cells expressing GlyR- $\alpha$ 3L and GlyR- $\alpha$ 3K a clear positive peak was seen,  
351 indicative of real co-localization. For cells expressing non-interacting GlyR- $\alpha$ 3L-eGFP and Lyn-mCherry,  
352 this peak was generally absent or very small and wide (Fig. 3C, right), indicative of a specific co-  
353 localization.

354 Although Pearson's correlation is an excellent qualitative proof for protein-protein co-localization, to  
355 more directly investigate the hetero-oligomerization of the slowly diffusing GlyR- $\alpha$ 3 population we  
356 used dual-color cross-correlation TICS (TICCS) in HEK293 cells co-expressing GlyR- $\alpha$ 3L-eGFP and  
357 GlyR- $\alpha$ 3K-mCherry [31, 40]. For TICCS, image acquisition of the bottom membrane was performed  
358 using dual-color fast alternating TIRF-based excitation microscopy (Fig. 3D). For each pixel position in  
359 the image series, the fluorescence time traces (Fig. 3E) were temporally auto- and cross-correlated  
360 (Fig. 3F, Eq. 10). While the temporal autocorrelation and cross-correlation functions on their own allow  
361 determining molecular parameters such as mobility (Eq. 11), the relative cross-correlation additionally  
362 is a proof for their co-diffusion, and even a measure for the interaction affinity between them [47]. For  
363 cells co-expressing GlyR- $\alpha$ 3L-eGFP and GlyR- $\alpha$ 3K-mCherry we measured a high relative  
364 cross-correlation (Fig. 3G, Eq. 12) that was similar to cells co-expressing GlyR- $\alpha$ 3L-eGFP and  
365 GlyR- $\alpha$ 3L-mCherry. This is a result from a similar high interaction affinity. Note that even for constantly  
366 interacting or even covalently linked molecules the maximum interaction value is typically around 50-  
367 60% (it never reaches the theoretical 100%) since it is limited due to factors such as incomplete  
368 fluorescent protein maturation or the partial overlap between green and red microscope detection  
369 volumes [48]. As a negative control, we analyzed cells containing GlyR- $\alpha$ 3L-eGFP and Lyn-mCherry  
370 (Fig. 3G). We observed a very low cross-correlation amplitude (Fig. S3E) and significantly lower relative  
371 cross-correlation.

372 In contrast to single-color fluctuation experiments, dual-color TICCS offers the additional possibility to  
373 focus specifically on the diffusion properties of the heteropentameric complexes containing both eGFP  
374 and mCherry fluorophores. In line with the single-color experiments, these data also show that GlyR-  
375  $\alpha$ 3L/K complexes exhibit higher diffusion coefficients compared to GlyR- $\alpha$ 3L-eGFP/mCherry  
376 homopentamers (Fig. 3H, Table S2). Interestingly though, the heteropentamer  $D$  derived from the  
377 cross-correlation function was completely indistinguishable from that of K homopentamers, indicating  
378 that the K splice variant dominates the diffusion pattern of K/L heteropentamers. Together, the  
379 Pearson's correlation and dual color TICCS experiments prove that GlyR- $\alpha$ 3L and GlyR- $\alpha$ 3K are  
380 localizing and diffusing as a complex. As the masked analyses we perform allow focusing on GlyR  
381 pentamers, this must mean the GlyR- $\alpha$ 3K and GlyR- $\alpha$ 3L splice variants can heteropentamerize.  
382 Moreover, heteropentamer diffusion is dictated by the short-loop splice variant K. We next wondered  
383 whether these heteropentamers existed in a defined heterostochiometry or not.

384

385 The stoichiometry of GlyR heteropentamers depends on the relative subtype expression

386 To provide further insights into the stoichiometry of heteropentamers we performed two types of  
 387 experiments: single-molecule step-wise photobleaching and molecular brightness analysis. For the first  
 388 experiment, we performed continuous TIRFM single-molecule imaging of the eGFP labels in fixated  
 389 cells co-expressing GlyR- $\alpha$ 3L-eGFP and GlyR- $\alpha$ 3K-mCherry and analyzed the resulting single-molecule  
 390 traces with a step-finding algorithm to count the number of fluorescing eGFPs in a single complex  
 391 (Fig. 4A). As the co-localization and fluctuation experiments showed that under such experimental  
 392 conditions, these complexes are most likely heteropentamers containing both eGFP and mCherry  
 393 fluorophores, it is expected that compared to samples containing GlyR- $\alpha$ 3L-eGFP homopentamers  
 394 (Fig. 1D), the number of eGFP moieties per complex should be lower. Indeed, the experimental data  
 395 revealed a distribution with, on average, less eGFP subunits per spot compared to GlyR- $\alpha$ 3L-eGFP  
 396 homopentamers (Fig. 4B; Kolmogorov-Smirnov test  $p < 0.01$ ).

397

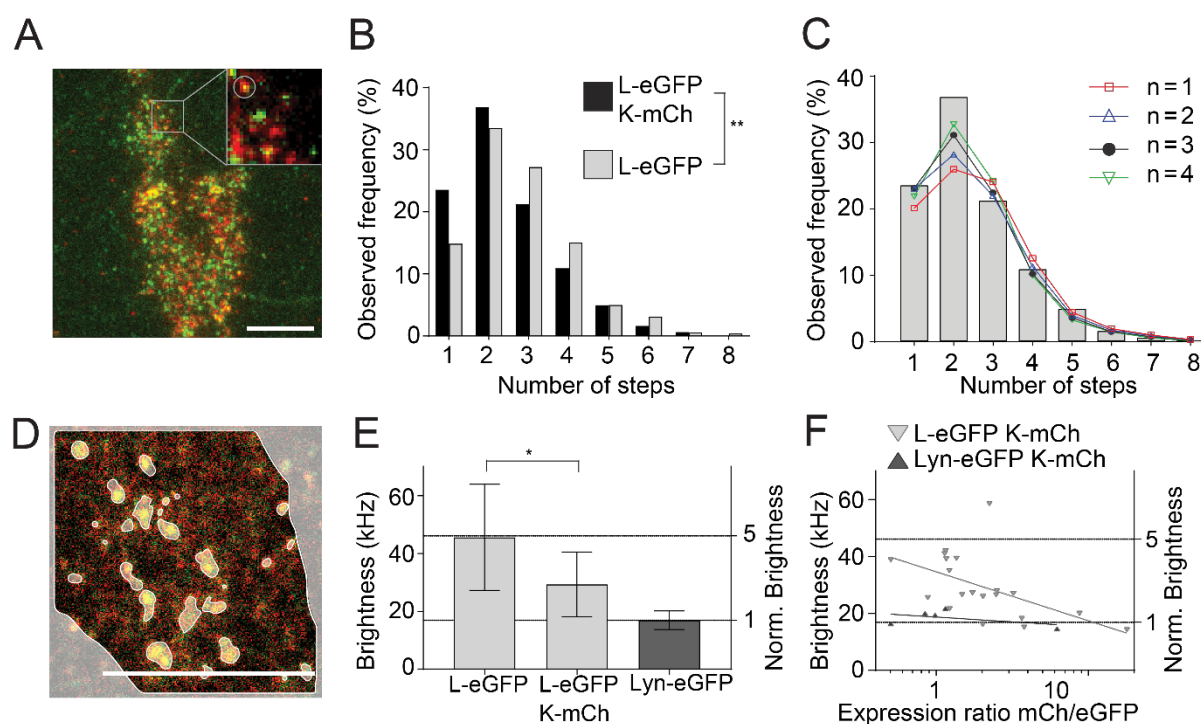

398

399

400 Fig. 4: Automated subunit analysis and molecular brightness analysis shows the effect of relative  
 401 expression on the GlyR stoichiometry. A) Representative images of HEK293 cells expressing  
 402 GlyR- $\alpha$ 3L-eGFP (green) and GlyR- $\alpha$ 3K-mCherry (red). Scale bar 10  $\mu$ m. B) Step distribution  
 403 histogram of GlyR- $\alpha$ 3L-eGFP in the presence (light grey, 301 spots) and absence (black, 477  
 404 spots) of GlyR- $\alpha$ 3K-mCherry. In the presence of GlyR- $\alpha$ 3K-mCherry there is a significant shift  
 405 towards a lower number of GlyR- $\alpha$ 3L-eGFP subunits. \*\* $p$ -value  $< 0.01$  obtained with  
 406 Kolmogorov-Smirnov test. C) Fitted binomial distribution functions with a sum of a 5<sup>th</sup> order

407 binomial and  $n^{\text{th}}$  order ( $n=1-4$ ) binomial. See Table S4 for heteromeric fraction and  $p$ -value for  
408 the fit ( $\chi^2$ -test). D) Representative confocal microscopy image of the first frame from an image  
409 series of a HEK293 cell expressing GlyR- $\alpha$ 3L-eGFP and GlyR- $\alpha$ 3K-mCherry. Scale bar 10  $\mu\text{m}$ . E)  
410 Molecular brightness comparison of the membrane-bound monomeric protein Lyn-eGFP to  
411 GlyR- $\alpha$ 3L-eGFP in either the presence or absence of GlyR- $\alpha$ 3K-mCherry. Error bars represent the  
412 standard deviation from  $n = 5-20$  measurements (see Table S5 for  $n$ ). \*  $p$ -value  $< 0.05$  obtained  
413 via an unpaired two sample  $t$ -test with unequal variance of the data. F) Molecular brightness of  
414 GlyR- $\alpha$ 3L-eGFP (light grey) and monomeric Lyn-eGFP (dark grey) in the presence of variable  
415 amount of GlyR- $\alpha$ 3K-mCherry. The semilog line fit shows a decrease in brightness for GlyR- $\alpha$ 3L-  
416 eGFP upon increasing ratio of GlyR- $\alpha$ 3K-mCherry to GlyR- $\alpha$ 3L-eGFP.

417

418 We fitted the resulting step frequency distribution using two binomials, one representing the  
419 heteropentamer (up to 4 GlyR- $\alpha$ 3L-eGFP subunits) and the other the homopentamer fraction (Eq. 2,  
420 Fig. 4C). The maturation probability ( $p_m$ ) and probability of overlapping spots (1-A) was fixed to 47%  
421 and 12%, respectively, based on the experiments on homopentamers (Fig. 1D), while the relative  
422 fraction of heteropentamers was fitted. The goodness-of-fit obtained via the  $\chi^2$ -test (Supplementary  
423 Table S4) was best for a 3rd order binomial and a heteropentameric fraction of 36% (goodness-of-fit  
424  $P$ -value from a  $\chi^2$  test = 0.725, with 1 being a perfect fit). However, as relatively good fits were obtained  
425 as well with a 2nd ( $P$ -value = 0.332) or 4th ( $p$ -value = 0.672) order binomial for a heteropentameric  
426 fraction of 23% and 67% respectively, these analyses are compatible with a scenario where  
427 heteropentamers contain on average 2-4 eGFP-containing subunits.

428 For the molecular brightness analysis, we recorded a confocal image series of living cells expressing  
429 GlyR- $\alpha$ 3L-eGFP alone, or together with GlyR- $\alpha$ 3K-mCherry (Fig. 4D) and analyzed the molecular  
430 brightness in the eGFP detection channel via dynamic-ROI based RICS (Eq. 7). As expected, this  
431 revealed a significantly lower molecular brightness for L/K heteropentamers as compared to L  
432 homopentamers (Fig. 4E, Table S5). Interestingly, the molecular brightness calculated in the eGFP  
433 channel scaled with the signal (count rate) ratio of GlyR- $\alpha$ 3K-mCh compared to GlyR- $\alpha$ 3L-eGFP (Fig.  
434 4F), and a few cells even exhibited a similar molecular brightness as observed for the monomeric  
435 control Lyn-eGFP, meaning the presence of heteropentameric GlyRs with only a single L-eGFP subunit.  
436 Taken together, these experiments suggest the stoichiometry of GlyR- $\alpha$ 3 heteropentamers is not fixed  
437 but variable, and depends on the relative expression of the L and K subtypes.

438

#### 439 The $\alpha$ 3K electrophysiological signature dominates in heteropentamers

440 At this stage, we revealed the existence of K/L heteropentamers and investigated their molecular  
441 organisation. Lastly, we wanted to investigate possible functional differences between

442 heteropentamers and homopentamers. Indeed, this might help to understand the consequences of an  
443 aberrant L/K ratio as observed in TLE. Practically, we used on-cell single-channel patch-clamp  
444 electrophysiology as opposed to whole-cell measurements to avoid averaging out activities of different  
445 co-existing species. Moreover, to verify the GlyR expression levels and ensure patch clamp  
446 measurements were performed under identical conditions as the fluorescence experiments, the patch  
447 clamp setup was mounted directly onto the single-molecules fluorescence microscope used for the  
448 stepwise photobleaching and TICS/TICCS experiments. Cells were transfected with either GlyR- $\alpha$ 3L-  
449 eGFP or GlyR- $\alpha$ 3K-mCherry, or with both. Importantly, the transfection conditions were similar to  
450 those used in the TICCS measurements, where we showed a high prevalence of heteropentamers for  
451 cells transfected with both plasmids. We selected cells with proper expression levels using  
452 fluorescence microscopy (Fig. 5A) and then performed on-cell single-channel electrophysiology to  
453 determine different possible conductance states (Fig. 5B).

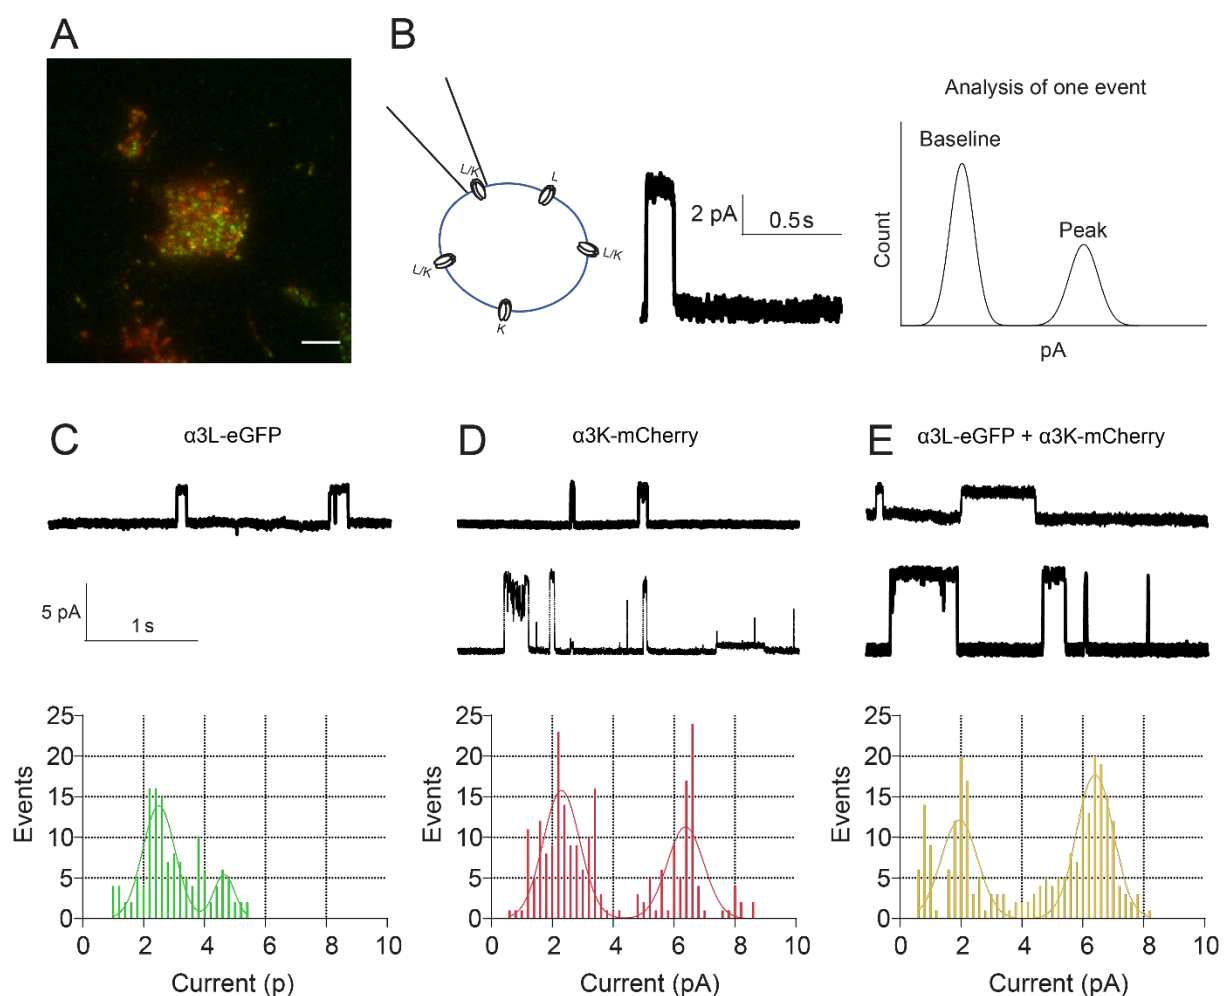

454  
455 **Fig. 5. On-cell measurements show activated  $\alpha$ 3K yields a high-current conducting state.** A)  
456 Transfected cells are identified by eGFP or mCherry fluorescence. Scale bar 5  $\mu$ m. B) Example of  
457 a current time trace and analysis of a single opening event during which a peak current is seen.  
458 On-cell measurements are performed by placing a patch pipette to measure chloride currents



459 through a single glycine receptor. For each single channel event, a histogram of all measured  
460 currents is fit with a double gaussian, yielding a best fit value for the mean baseline current and  
461 the mean peak current. Subtracting the mean baseline current from the mean peak current  
462 yields the 'mean current of the single opening event' C-E) Examples of single-channel current  
463 traces with accompanying histograms of 'mean currents of the single opening events' of cells  
464 transfected with  $\alpha$ 3L ( $n = 10$ , red),  $\alpha$ 3K ( $n = 18$ , blue) or  $\alpha$ 3L and  $\alpha$ 3K ( $n = 15$ , black). Histograms  
465 were fit with a double Gaussian to identify the most common peak amplitudes of single events.  
466 For  $\alpha$ 3K and for  $\alpha$ 3L and  $\alpha$ 3K an example of both a low and a high current single-channel trace  
467 is shown.

468  
469 Like this, we could reveal two frequently occurring states for all tested conditions (Fig. 5C-E), with the  
470 first conductance state (around 2.3 pA) similar for all conditions (K, L and K/L), but the second  
471 conductance state showing significantly lower currents for  $\alpha$ 3L (around 4.7 pA) compared to  $\alpha$ 3K and  
472  $\alpha$ 3L +  $\alpha$ 3K (around 6.4 pA). Contrary to what is known from [25-29] literature, our data seem to  
473 indicate that the presence of the  $\alpha$ 3K subunit in the GlyR yields higher currents.

## 474 **Discussion**

475 The glycine receptor is a ligand-gated chloride channel that plays a crucial role in the general physiology  
476 of the CNS. Its  $\alpha 3$  isoform, in particular, is involved epilepsy and chronic pain [5, 9, 26]. Two splice  
477 variants of  $\alpha 3$  exist (Fig. 1A). As homopentamers, the splice variants differ in subneuronal distribution,  
478 electrical conductance and desensitization, clustering tendency, interactions with subcellular  
479 components and diffusion properties [3, 5, 6, 20-22], yet it is not known whether L and K variants can  
480 heteropentamerize. Indeed, such a process may lead to new or intermediate properties, or properties  
481 biased more towards one variant or the other. In an attempt to provide a more detailed fundamental  
482 cell-biological understanding of the working of GlyR- $\alpha 3$ , we thus investigated the hypothesis that the  
483 different splice variants of GlyR- $\alpha 3$  can assemble into functional heteropentamers. To prove this  
484 hypothesis via advanced fluorescence imaging we first had to set up a new quantitative image analysis  
485 methodology for studying single pentamers in a complex sample, cell membranes containing both  
486 single pentamers and clusters of the same protein. Then, using this methodology we revisited prior  
487 work on the diffusion properties of GlyR- $\alpha 3$  splice variants in HEK293 cells to unequivocally prove  
488 whether RNA splicing determines the membrane mobility of the protein. Only hereafter could we  
489 embark on proving the existence of GlyR- $\alpha 3$ L/K heteropentamers, and on quantifying their molecular  
490 and functional properties.

491

### 492 Tools for studying defined molecular species in the case of oligomerization/clustering

493 A first methodological aim was to set up the necessary experimental tools to quantify single GlyR- $\alpha 3$   
494 pentamer properties in cells. This is particularly challenging because of the tendency of GlyR- $\alpha 3$  to  
495 form subcellular clusters [5, 22, 23] that would overshadow the analysis. In previous research done by  
496 Notelaers et al., GlyR- $\alpha 3$  properties were investigated using fluctuation spectroscopy, single-molecule  
497 and super-resolution fluorescence methods, yet it was not explicitly investigated which observed  
498 species were representative of single pentamers or clusters [20-22]. Indeed, although image  
499 correlation spectroscopy (ICS) methods are quite robust in quantifying concentrations, diffusion and  
500 stoichiometry for monodisperse samples [49], they perform particularly badly in the case of  
501 polydisperse ones containing clusters, aggregates or multimeric species [50-52]. Here, we exploited  
502 the molecular fluorescence brightness of fluorescent protein labeled GlyR splice variants to validate  
503 that our methodology does specifically allow studying single pentamer properties. On the one hand,  
504 we performed subunit counting via stepwise photobleaching [32, 33] experiments in low-expressing  
505 cells in which fluorescent homomeric GlyR- $\alpha 3$ L-eGFP was present as clearly discernable fluorescent  
506 spots (Fig. 1C-D). This way we found that the number of fluorescence bleaching steps per spot was  
507 similar to the previously studied GlyR- $\alpha 1$  under non-clustering conditions in HEK293 cells [32, 36]. On  
508 the other hand, we used a more recent extension of classical ICS called arbitrary-region ICS (ARICS)

509 [50], where image series are segmented based on the local pixel fluorescence intensity, to specifically  
510 quantify the average molecular fluorescence brightness for single GlyR pentamer complexes diffusing  
511 in the live cell membrane (Fig. 1E-H; Video S1-2). With this analysis, we could show that results for (the  
512 more clustering-prone) homomeric GlyR- $\alpha$ 3L-eGFP expressing cells were in line with non-clustering  
513 stoichiometric control proteins. This finally proved that our cellular expression system, HEK293 cells  
514 expressing fluorescent protein labeled GlyR splice variants from a crippled CMV promotor, and single-  
515 molecule photobleaching and segmented ICS analyses, are adequate for studying single pentamer  
516 properties, even when a non-negligible clustering subpopulation is present. Apart from the  
517 investigations performed in the rest of our paper, the methodological toolbox presented here can be  
518 applied for examining protein interactions, oligomerization, mobility and stoichiometry of other  
519 oligomeric receptors or multimeric proteins. Also, relative to the original methodological publication  
520 on segmented ICS [50] (detailed protocol in [53]), we did extend our in-house developed software for  
521 robust segmented single- and dual-color raster and temporal ICS analysis. This software can be  
522 downloaded free-of-charge (see Materials and Methods), is fully documented  
523 (<https://pam.readthedocs.io/en/latest/mia.html>), can be operated via a convenient graphical user  
524 interface from Microsoft and Apple operating systems, accepts a variety of images/videos, and can  
525 export figures and videos directly in publication-format.

526

#### 527 Specific subcellular interactions of single GlyR- $\alpha$ 3L pentamers decrease their membrane mobility

528 Physiologically, GlyR- $\alpha$ 3 is present in cells both as clustered and single pentamers. While  $\alpha$ 3K is more  
529 randomly distributed over the cell membrane, the situation for  $\alpha$ 3L is balanced somewhat more in  
530 favor of clusters. The  $\alpha$ 3L interacts with submembranous components specifically enriched at the  
531 presynapse, where it can promote (at glutamatergic nerve termini) neurotransmitter release [6].  
532 Functionally, clustering of  $\alpha$ 3L thus seems to be an efficient way to promote this local enrichment.  
533 Notelaers et al. previously reported that overall, the subcellular mobility of  $\alpha$ 3L was lower than of  $\alpha$ 3K  
534 [20, 21]. For systems undergoing Brownian diffusion, the mobility (more specifically, the translational  
535 diffusion constant) of a freely-diffusing entity scales inversely with its size (Einstein-Smoluchovski  
536 relation). For membrane proteins in particular, mobility scales with the radius of the transmembrane  
537 region [54] [54, 55]. For the specific case of GlyR- $\alpha$ 3L, receptor clustering would increase the size of  
538 the diffusing complex, and this would reduce mobility. Likewise, however, strong interactions of GlyR-  
539  $\alpha$ 3 with large or immobile submembranous components would also likely reduce its overall mobility.  
540 As a follow-up of the work of Notelaers et al., we investigated whether a difference in single-pentamer  
541 mobility between the L and K variants can also be detected using our experimental setup. To this  
542 extent, we performed both confocal and TIRF-based microscopy and ICS analysis of GlyR- $\alpha$ 3 expressing  
543 HEK293 cells to study the diffusion properties of the two splice variants. We segmented the images

544 before ICS analysis to exclude those pixel regions containing GlyR clusters. Via confocal raster ICS (RICS)  
545 analysis we observed a fast freely diffusing component for both isoforms with similar diffusion  
546 coefficients ( $D_{\alpha 3L} = 0.26 \pm 0.11 \mu\text{m}^2/\text{s}$  and  $D_{\alpha 3K} = 0.29 \pm 0.08 \mu\text{m}^2/\text{s}$ ) (Fig. 2A-E, Table S1). The existence  
547 of this freely diffusing component, that has been described before [21], suggests that at least a fraction  
548 of the GlyR- $\alpha 3$  population does not interact with immobile cellular components, or that the mere  
549 limited affinity for the latter defines the presence of a significant unbound component. The presence  
550 of functional GlyRs with relatively high mobility is, however, not surprising. It could allow for a faster  
551 reconstitution of non-desensitized GlyR receptor pools, as has been shown previously for the AMPA  
552 receptor, another ligand-gated ion channel [56]. When we studied the diffusion of single GlyR- $\alpha 3$   
553 pentamers using TIRF-based temporal ICS (TICS), we observed a second, much less mobile species for  
554 both splice variants, which, interestingly, was even less mobile for  $\alpha 3L$  as compared to  $\alpha 3K$  ( $D_{\alpha 3L} =$   
555  $0.057 \pm 0.014 \mu\text{m}^2/\text{s}$  and  $D_{\alpha 3K} = 0.089 \pm 0.023 \mu\text{m}^2/\text{s}$ ) (Fig. 2F-I, Table S1-S2). This observation, in term,  
556 strongly suggests that the 15-residue-longer loop of GlyR- $\alpha 3L$  relative to GlyR- $\alpha 3K$  does indeed  
557 stabilize interactions with cellular interaction partners such as proteins or lipids, independent of GlyR  
558 clustering [6]. For primary neuron hippocampal cells, vesicular transport protein SEC8 targets the GlyR-  
559  $\alpha 3L$  to the presynapse, and in vivo, GlyR- $\alpha 3L$  was indeed detected at presynaptic terminals of  
560 glutamatergic and GABAergic neurons [6]. An interesting follow-up study would be to use site-directed  
561 mutagenesis of the insert region to more closely study sequence motifs of GlyR- $\alpha 3L$  binding partners  
562 that control axonal receptor trafficking and localization. Conversely, GlyR- $\alpha 3K$  is mainly distributed  
563 somatodendritically, but is also expected to be present in axonal and presynaptic compartments as  
564 this splice variant lacks a subcellular targeting signal and hence diffuses throughout the neuronal  
565 plasma membrane. This notion is furthermore supported by a recent study showing that there is no  
566 GlyR- $\beta$  protein expression in hippocampal neurons [57], which could target the GlyR- $\alpha/\beta$   
567 heteropentamers to postsynaptic gephyrin-positive scaffolds [19, 58].

568

#### 569 GlyR- $\alpha 3L$ and GlyR- $\alpha 3K$ splice variants form heteropentamers of variable stoichiometry.

570 Co-clusters of GlyR- $\alpha 3$  splice variants have already been reported [22]. The single-color TICS  
571 experiments we performed in the present study, however, provided a first hint towards a direct  
572 interaction between  $\alpha 3L$  and  $\alpha 3K$  splice variants in the form of heteropentamers, since co-expression  
573 of  $\alpha 3K$  increased the mobility of single  $\alpha 3L$  pentamers ( $D_{\alpha 3L} = 0.047 \pm 0.012 \mu\text{m}^2/\text{s}$  and  $D_{\alpha 3L+K} = 0.061$   
574  $\pm 0.011 \mu\text{m}^2/\text{s}$ ) (Table S2). Hetero-oligomers of different isoforms of GlyR- $\alpha/\beta$  [59] and of other ion  
575 channels such as the NMDA receptors have been described before, and also the biogenesis of GlyR- $\alpha 3$   
576 would be compatible with it [60]. For GlyR- $\alpha 3$  they are of specific interest because of the differential  
577 subcellular localization of splice variants [6] and because of their different electrophysiological  
578 desensitization signatures [3].

579 To provide a more conclusive answer, we first demonstrated co-localization between GlyR- $\alpha$ 3L and  
580 GlyR- $\alpha$ 3K upon co-expression in HEK293 cells using a spatial version of Pearson's colocalization analysis  
581 that is more robust against coincidental pixel co-localization (Fig. 3A-C, Fig. S3H, Table S3) [44, 61].  
582 Subsequently, we used dual color temporal ICS (TICCS) to unequivocally demonstrate, for the first time,  
583 heteropentamerization of GlyR- $\alpha$ 3L and GlyR- $\alpha$ 3K (Fig. 3D-G, Table S2). Finally, we employed direct  
584 subunit counting via stepwise photobleaching to quantify that the average stoichiometry of  
585 heteropentamers is 2-4  $\alpha$ 3L-eGFP-containing subunits (Fig. 4A-C, Table S4). A non-negligible  
586 homomeric fraction was also present in all datasets, which furthermore supports the absence of a  
587 defined heterostochiometry. Direct subunit counting via stepwise photobleaching was previously  
588 used to show that  $\alpha$ 1 and  $\beta$  isoforms, genetically labeled with fluorescent proteins, heteropentamerize  
589 in a  $\alpha$ 3 $\beta$ 2 stoichiometry [59]. Finally, we carried out molecular brightness analysis to reveal that the  
590 heterostochiometry is indeed variable and depends on the expression ratio of both splice variants (Fig.  
591 4D-F, Table S5). Putting all stoichiometry data together we did not provide any evidence for a highly  
592 specific  $\alpha$ 3L/K stoichiometry.

593

#### 594 GlyR- $\alpha$ 3L/K heteropentamers have GlyR- $\alpha$ 3K-like mobility and conductance characteristics.

595 The presence of heteropentamers can have several implications for GlyR- $\alpha$ 3 function. In this paper, we  
596 investigated the subcellular mobility and electrophysiological signature of heteropentamers. Single-  
597 color TICS provides a readout of mobility, and evidenced that co-expression of  $\alpha$ 3K increased the  
598 mobility of  $\alpha$ 3L (Fig. 2J, Table S2). Of course, in the case of a subcellular mixture of homo- and  
599 heteropentamers, such single-color measurements only provide an average view, which is why we next  
600 performed a mobility analysis of only those species containing both  $\alpha$ 3K and  $\alpha$ 3L via image cross-  
601 correlation analysis via dual-color temporal ICS (TICCS) (Fig. 3H, Table S2). From these experiments it  
602 became apparent that the diffusion signature of the K isoform is dominant for the mobility of the  
603 heteropentamers. This additionally suggests that the subcellular interactions of  $\alpha$ 3L that render its  
604 mobility slow are multivalent rather than monovalent. As many as 5 units of  $\alpha$ 3L thus seem to be  
605 needed to result in its homomeric mobility signature. This might mean that the affinity of subcellular  
606 interactions of  $\alpha$ 3L is rather low, and that an avidity effect leads to the observed reduced mobility of  
607 homomers. Finally, combined on-cell patch clamp and fluorescence microscopy allowed us to  
608 investigate the single channel current of GlyR- $\alpha$ 3 in cells expressing both GlyR- $\alpha$ 3L-eGFP and GlyR- $\alpha$ 3K-  
609 mCherry. A GlyR- $\alpha$ 3K-shifted conductance was observed for cells containing heteropentamers, which  
610 was larger in amplitude compared to currents from GlyR- $\alpha$ 3L-eGFP homopentamers.

611 As GlyR- $\alpha$ 3L adopts the mobility signature of GlyR- $\alpha$ 3K in heteropentamers, in regions of the brain  
612 where co-expression of GlyR- $\alpha$ 3L and GlyR- $\alpha$ 3K occurs, this could mean that heteropentamerization  
613 influences GlyR renewal in the plasma membrane, and as a result GlyR functionality. Consequently,

614 this further stresses the importance of well-regulated alternative splicing for GlyR- $\alpha$ 3 signaling. As in  
615 healthy people there is an increased presence of GlyR- $\alpha$ 3L compared to GlyR- $\alpha$ 3K, a small increase in  
616 alternative splicing would have an effect on even more GlyR- $\alpha$ 3L pentamers due to  
617 heteropentamerization. Due to heteropentamerization a higher fraction of GlyR- $\alpha$ 3L containing  
618 pentamers will have a higher mobility, which could enable faster reconstitution of the  
619 non-desensitized GlyR receptor pool [56]. The results from electrophysiology in particular also point to  
620 the possibility that the neuronal output can be increased by GlyR- $\alpha$ 3 heteropentamers, particularly in  
621 conditions such as TLE where increased RNA editing and resulting gain-of-function receptors lever out  
622 rules of homeostatic regulation of the neuronal output [6, 14]. Importantly, subcellular trafficking and  
623 localization (pre- or postsynaptic, or e.g. in the distal and basolateral membrane compartments of  
624 epithelial cells) must be logically and interpretively distinguished from terms that describe single  
625 channel signatures of mobility and electrophysiology (conductance states). Indeed, a single receptor  
626 pentamer with specific mobility and conductance states can lead to very different outcomes depending  
627 on its subcellular localization. For example, due to its very small surface, the electrical capacity (C) of a  
628 presynapse is much lower compared to the somatodendritic compartment, and hence, one single  
629 channel conductance of chloride ions (Q) through the presynaptic plasma membrane will have a much  
630 greater impact on membrane potential (U) compared to the same conductance in the somatodendritic  
631 compartment ( $\Delta U = Q/C$ ).

632 **Conclusion**

633 In this work, we investigated the long (L) and short (K) intracellular loop splice variants of the GlyR- $\alpha$ 3  
634 isoform, that is related to chronic pain and temporal lobe epilepsy. We unambiguously showed that  
635 these splice variants co-assemble into electrophysiologically active heteropentamers in live HEK293  
636 cells. To do this, we had to set up and validate a combination of advanced single-molecule  
637 fluorescence, fluorescence fluctuation correlation and patch clamp methods, as the GlyR- $\alpha$ 3 tends to  
638 cluster inside cell membrane, and this clustering is extraordinarily challenging for quantitative  
639 investigations. First and foremost, this work constitutes a methodological framework that can be used  
640 for investigating other types of complex hetero-oligomerizing molecular systems in a cell-biological  
641 context. Biologically, it turned out that, while the GlyR- $\alpha$ 3L was well-known to determine the  
642 subcellular localization of GlyR- $\alpha$ 3 channels, GlyR- $\alpha$ 3K is leading in the regulation of both the in-  
643 membrane mobility of GlyR- $\alpha$ 3, as well as in the ion channel's activity. Indeed, heteropentamers were  
644 both more mobile than L homomers, and exhibited a larger open-state electrical conductance. Future  
645 research could be aimed at studying GlyR heteropentamer clustering, localisation and activity in  
646 primary neuron cells, as this would corroborate the importance of heteropentamers in neuronal  
647 signaling. Likewise, measuring channel open times would prove that heteropentamerization is  
648 important for fine-tuning of neuronal activity, which would, in turn, provide insights into the  
649 desensitization behaviour of heteropentamers.

650

651 **Materials and methods**

652 **DNA plasmids**

653 Plasmids encoding mouse GlyR- $\alpha$ 3L or  $\alpha$ 3K containing an N-terminal eGFP or mCherry were already  
654 described [62] or obtained accordingly using standard molecular cloning technology by replacing  
655 mCherry with eGFP. N-terminal eGFP insert was amplified with PCR (5'-  
656 CGGTCTCCGGAATGGTGAGCAAGGGC-3' and 5'-GGCCTCCGACTTGTACAGCTCGTCCATGC-3'), the GlyR-  
657  $\alpha$ 3L/K plasmids and the amplified eGFP insert were digested with BspE1. The vector plasmids were  
658 treated with calf intestine phosphatase before the ligation was performed. The enhancer region of the  
659 cytomegalovirus promoter in the GlyR- $\alpha$ 3-coding plasmids was shortened similar as in [34] to reduce  
660 expression levels by mutagenesis. We did this by amplification of the GlyR-FP plasmids using PCR with  
661 primers 5'-ATATGGTACCTGGGAGGTCTATATAAGCAGAG-3' and 5'-  
662 ATAAGGTACCCCAGGCGGGCCATTTACCGTA-3' followed by digestion with KpnI (ThermoFisher  
663 Scientific, Merelbeke, Belgium) and ligation using instant sticky-end ligase Master mix (NEB, Bioké  
664 Leiden, Nederland). Plasmids used as a negative control (Lyn-FP) were first used in [63] as a negative  
665 control for membrane receptor dimerization and encode the tyrosine-protein kinase Lyn coupled to a  
666 fluorescent protein eGFP or mCherry. Plasmids expressing eGFP or an oligomeric chain of 3 or 5 eGFPs  
667 (eGFP, eGFP<sub>3</sub> and eGFP<sub>5</sub>) previously used in [64] were used as an stoichiometric reference.

668

669 **Cell culture and transfection**

670 Human embryonic kidney 293 cells (HEK293 cells, provided by Dr. R. Koninckx, Jessa Hospital, Hasselt,  
671 Belgium) were cultured up to a maximum passage number of 20, at 37 °C and under a humidified  
672 5% CO<sub>2</sub> atmosphere in complete DMEM medium (D6429, Sigma-Aldrich, Overijse, Belgium)  
673 supplemented with 10% FCS (Sigma-Aldrich). At least 24 h before transfection, 150,000 cells were  
674 plated in complete medium in a 35-mm diameter #1.5 (170  $\mu$ m glass thickness) glass bottom dish  
675 (MatTek, Bratislava, Slovak Republic). Cells were transfected via calcium phosphate-DNA  
676 co-precipitation [65]. The phosphate-DNA mix contained 86  $\mu$ L HEPES-buffered saline (HBS) (280 mM  
677 NaCl, 10 mM KCl, 15 mM D-glucose, 1.5 mM Na<sub>2</sub>HPO<sub>4</sub>.2H<sub>2</sub>O, 50 mM HEPES, pH 7.1,) and 2000 ng total  
678 plasmid DNA per dish including the 50-1000 ng FP-tagged encoding plasmids supplemented with an  
679 empty plasmid vector (pCAG-FALSE, Addgene plasmid #89689) depending on the aimed fluorescence  
680 level [35]. To this mix 5.1  $\mu$ L 2.5 M CaCl<sub>2</sub> was added, and after 10 min of incubation at room  
681 temperature (RT) the mix was added dropwise to the cells.



## 682 Immunostaining

683 Fixed cells expressing human GLRA3 were permeabilized at RT with permeabilization buffer (40 mL  
684 PBS, 2 g sucrose, 400  $\mu$ L 10% Triton X-100) during 5 min, after which the cells were washed twice with  
685 washing buffer (40 mL PBS + 40  $\mu$ L Triton X-100 10%). Next, cells were incubated for 10 min with  
686 proteinase K (0.1%, Thermo Fisher Scientific, Merelbeke, Belgium) for antigen retrieval. After washing  
687 once again with washing buffer, a blocking buffer (40 mL PBS + 0.4 g BSA + 40  $\mu$ L Triton X-100 10%)  
688 was added to the cells. Finally, cells were incubated for 1 h with the primary anti-GLRA2 (1/2000 in  
689 blocking buffer; ab97628 Abcam, Cambridge, England), washed 3 times with blocking buffer and  
690 incubated for 2 h with Alexa 647 anti-rabbit (1/250, A21247, Thermo Fisher Scientific). After washing  
691 the cells 3 times with PBS, the cells were stored at 4 °C for limited time.

692

## 693 Total internal reflection and widefield fluorescence microscopy imaging

694 A Zeiss ELYRA PS.1 inverted microscope with a Plan-Apochromat 100x/1.46 oil DIC M27 objective lens  
695 and Andor iXon+ 897 EMCCD camera operated at EM gain  $\sim$ 200 was used in total internal reflection  
696 fluorescence (TIRF) mode to selectively excite molecules near ( $<$  200 nm) the bottom cell membrane.  
697 Images were recorded at room temperature using a multiband emission filter LBF 488/561 at a  
698 resolution of 256 $\times$ 256 pixels<sup>2</sup> and a pixel size of 150 nm. The 488 nm and 561 nm HR diode-pumped  
699 solid-state lasers were used. Immunostaining imaging was done on the same setup, using an additional  
700 642 nm HR diode-pumped solid-state laser. The reported laser powers were measured on the objective  
701 lens with immersion oil using a calibrated S170C microscope slide power sensor head (Thorlabs,  
702 Dortmund, Germany). Imaging was done using the ZEN software (Zeiss).

703

## 704 Subunit counting by photobleaching analysis

705 TIRF images were acquired as described above using cells transfected with 50 ng GlyR- $\alpha$ 3L-eGFP and 0-  
706 500 ng GlyR- $\alpha$ 3K-mCherry which were fixated 22 h post-transfection for 24 h at 4 °C using 3% (w/v)  
707 paraformaldehyde in phosphate buffered saline. Before acquiring the images for the photobleaching  
708 analysis, in each cell mCherry was photobleached with the 561 nm laser (5% power, 2.5 mW) in order  
709 to eliminate Förster resonance energy transfer between eGFP and mCherry. Next, 2000 frames were  
710 acquired at 100 ms per frame using the 488 nm laser at high enough power to induce step-wise  
711 photobleaching (1.5% power, 660  $\mu$ W). Data analysis was performed using the Progressive Idealization  
712 and Filtering (PIF) software kindly provided by Dr. Rikard Blunck [32]. Molecules were located by  
713 selecting of 5 $\times$ 5 pixels<sup>2</sup> spots with the signal-to-noise ( $\delta F/F$ ) setting at 20%. Next, intensity time traces  
714 were extracted from a 3 $\times$ 3 pixels<sup>2</sup> region in the center of each spot. Partially overlapping spots were  
715 excluded from analysis. Photobleaching steps were identified via a step-finding algorithm when steps  
716 had a minimum length of 3 frames, and steps were not allowed to vary more than 60% in amplitude

717 compared to other steps in the time trace. In addition, a minimal step signal-to-noise value of 2 was  
 718 required. Cells with more than 10% accepted traces were included in the step frequency histogram.  
 719 The step distribution of cells expressing only GlyR- $\alpha$ 3L-eGFP was analyzed using the sum of two  
 720 binomial distributions:

$$\begin{aligned}
 & B(x; n + 2n, p_m) && \text{(Eq. 1)} \\
 & = A \frac{n!}{x!(n-x)!} p_m^x (1-p_m)^{n-x} + (1 \\
 & - A) \frac{2n!}{x!(2n-x)!} p_m^x (1-p_m)^{2n-x}
 \end{aligned}$$

721  
 722 where  $B$  is the likelihood of observing  $x$  bleaching steps,  $n$  is the number of fluorescent eGFP  
 723 molecules present in a single GlyR complex ( $n = 5$ ),  $p_m$  is the probability that the fluorophore is  
 724 matured and non-bleached at the start of the recording,  $A$  is the fraction of spots containing not  
 725 more than one GlyR complex and  $1-A$  is the fraction of spots containing two GlyR complexes. This  
 726 equation assumes the fraction of spots containing more than two pentamers is negligible. In general,  
 727 the  $p_m$ -value reported in studies using subunit counting via stepwise photobleaching is typically on the  
 728 low side (50-80%) [32, 33, 66] compared to other studies (~80%) [67, 68]. The broad range is appointed  
 729 to variability between experimental groups such as the used cell line, fluorescent protein [69],  
 730 temperature during maturation [32], cell fixation and fluorophore prebleaching [70].  
 731 To describe the step distribution of cells expressing both GlyR- $\alpha$ 3L-eGFP and GlyR- $\alpha$ 3K-mCherry and  
 732 determine the stoichiometry ( $het$ ) of the heteropentamers, Eq. 1 was extended to:

$$\begin{aligned}
 & B(x; n + 2n + het + 2het, p_m) && \text{(Eq. 2)} \\
 & = H[B(x; n + 2n, p_m)] + (1 - H) [B(x; het + 2het, p_m)]
 \end{aligned}$$

733  
 734 Here  $H$  represents the fraction of homopentamers and  $1-H$  represents the fraction of heteropentamers  
 735 in the sample. Fitting this equation to the bleaching histograms of cells transfected with both, GlyR-  
 736  $\alpha$ 3L-eGFP and GlyR- $\alpha$ 3K-mCherry, gives best fit values for  $H$  and  $het$ . Goodness-of-fit was determined  
 737 using the chi-squared test. A good fit is indicated by a low  $\chi^2$  value with  $p > 0.05$ , the model does not  
 738 fit the data if  $p < 0.05$  [59].

739  
 740 Correlation analysis

741 Fluctuation imaging and co-localization analyses were performed in the software package PAM [71].  
 742 In all equations that follow, pre-processed intensity images  $I_i(x, y, t)$  are converted into fluctuation  
 743 images  $\delta I_i(x, y, t)$  prior to correlation analysis by subtracting the mean image intensity  $\langle I_i \rangle$ :

$$\delta I_i(x, y, t) = I_i(x, y, t) - \langle I_i \rangle \quad \text{(Eq. 3)}$$

744 where  $i$  is the imaging channel,  $(x, y, t)$  denote the pixel coordinates and the angled brackets  
745 represent the average of all pixels included into the region-of-interest used for analysis.

746

#### 747 Raster image correlation spectroscopy

748 We used an inverted Zeiss LSM880 laser scanning microscope with a Plan-Apochromat 63x/1.4 Oil DIC  
749 M27 oil objective and MBS488/594 beam splitter to image live cells transfected with 100 ng GlyR-  
750  $\alpha$ 3L-eGFP, 100 ng GlyR- $\alpha$ 3K-eGFP or 50 ng Lyn-eGFP alone and/or combined with 0-1000 ng GlyR- $\alpha$ 3K-  
751 mCherry, between 22-28 h post-transfection. Since RICS is ideally suited for capturing fast dynamics  
752 [31, 38, 41], the cells were held at 37 °C. However, to allow comparisons of RICS and TICS data, we did  
753 carry out limited RICS experiments at RT too (Fig. S3F). This revealed that the species observed with  
754 RICS still exhibited faster diffusion than those observed with TICS when measured at RT, and thus  
755 indeed represents a different subpopulation. Images were collected using parameters appropriate for  
756 RICS [42], i.e. 256x256 pixels<sup>2</sup> with a 50 nm pixel size. Pixel dwell, line and image times were 8.19  $\mu$ s,  
757 4.92 ms and 1.26 s, respectively. The eGFP species were excited with a 488 nm argon-ion laser (0.3%,  
758 1  $\mu$ W) and mCherry species with a 594 nm HeNe laser (1%, 6  $\mu$ W). Fluorescence was detected using a  
759 spectral detector (Zeiss Quasar) operated in photon counting mode in 23 spectral bins with  $\sim$ 9 nm bin  
760 width ranging from 490 nm to 695 nm. For quantitative analysis of eGFP-tagged molecules, bins 1-11  
761 (490 nm to 589 nm) were summed for further analysis. Prior to autocorrelation analysis, we excluded  
762 contributions from slow processes such as cell and cell organelle movement using a moving average  
763 correction according to [39, 41, 72]:

$$I_{RICS}(x, y, f) = I(x, y, f) - \langle I(x, y, f) \rangle_{\Delta F} + \langle I \rangle_{XYF} \quad (\text{Eq. 4})$$

764 in which  $I(x, y, f)$  corresponds to each individual image,  $\langle I(x, y, f) \rangle_{\Delta F}$  is the local mean image  
765 calculated over a short 3-frame interval from frame  $f - \Delta F$  to frame  $f + \Delta F$  with  $\Delta F = 1$ , and  $\langle I \rangle_{XYF}$   
766 is the mean intensity over all frames. Next, pixels outside the cell were removed by freehand-drawing  
767 based selection of the cell membrane, while GlyR clusters were removed using frame-based intensity  
768 thresholding. Specifically, both green and red images were first individually masked by intensity  
769 thresholding to remove (equalize to zero) pixels belonging to high-intensity clusters of fluorescence  
770 [50]. The final mask contained pixels that were included in each individual image's mask and was  
771 smoothed using a 3x3 median filter as described above for co-localization analysis. Subsequently, the  
772 autocorrelation function was calculated per image frame using the arbitrary region-of-interest RICS  
773 (ARICS) algorithm [50]:

$$G(\xi, \psi) = \frac{\langle \delta I_{RICS}(x, y) \cdot \delta I_{RICS}(x + \xi, y + \psi) \rangle}{\langle I_{RICS} \rangle^2} \quad (\text{Eq. 5})$$

774 in which  $\xi$  and  $\psi$  are the spatial lags in pixels, the  $\cdot$  is the correlation operator, the angled brackets  
775 represent the average of all included pixels within the mask and  $\langle I_{RICS} \rangle$  is the average of all moving-

776 average corrected pixels included into the region-of-interest used for analysis. To compare different  
 777 datasets, we often plot only the  $(\xi, 0)$  correlations (example in Fig. 1F) or  $(\xi, 0)$  and  $(0, \psi)$  correlations  
 778 (example in Fig. 2D). Finally, the autocorrelation function was fitted with a one-component model  
 779 assuming a two-dimensional Gaussian point spread function to obtain the diffusion coefficient,  $D$ , and  
 780 average number of molecules in the focus,  $N$ .

$$G(\xi, \psi) = \frac{\gamma}{N} \left( 1 + \frac{4D |\xi \tau_p + \psi \tau_l|}{\omega_r^2} \right)^{-1} \exp \left( - \frac{\delta r^2 (\xi^2 + \psi^2)}{\omega_r^2 + 4D |\xi \tau_p + \psi \tau_l|} \right) \quad (\text{Eq. 6})$$

781 Here  $\gamma$  is the shape factor for a 2D Gaussian and equals  $2^{-3/2}$  [73],  $\tau_p$  and  $\tau_l$  are pixel and line dwell  
 782 times,  $\delta_r$  is the pixel size and  $\omega_r$  the lateral waist of the focus determined by calibration  
 783 measurements (Fig. S4B). The RICS data was also used for calculating the molecular brightness of eGFP-  
 784 containing diffusing molecules. Brightness ( $\varepsilon$ ), expressed in kilophotons emitted per diffusing complex  
 785 per second at the center of the confocal spot, was calculated by dividing the mean intensity of the  
 786 image series ( $F$ ) by the number of molecules obtained via RICS autocorrelation analysis ( $N_{ACF1}$ )

$$\varepsilon = \frac{F}{N_{ACF1}}. \quad (\text{Eq. 7})$$

787 As stoichiometric references, cells were transfected with 5-10 ng eGFP, eGFP<sub>3</sub> or eGFP<sub>5</sub> encoding  
 788 plasmids and investigated 22-28 h post-transfection as described above. When determining  $N$ , the  
 789 moving average correction bias on the correlation amplitude was also corrected for as described  
 790 before (Eq. 11 in [50]). Finally, stably focusing on the bottom membrane was achieved using a Zeiss  
 791 Definite Focus.2 which acquired 60 frames at two different z-positions above the coverslip with an  
 792 interval of 0.4  $\mu\text{m}$ , alternating height each image frame, after which the time series at the z-position  
 793 with highest average intensity was selected for analysis. We did also observe a clear effect of focus  
 794 height above the coverslip on the molecular brightness, but not on the diffusion coefficient as shown  
 795 in Fig. S3G, and as described before [41].

796

### 797 Pearson's co-localization analysis

798 A 400-frame TIRF image series of live cells transfected with 100 ng GlyR- $\alpha$ 3-eGFP and 150 ng GlyR- $\alpha$ 3-  
 799 mCherry or 50 ng Lyn-mCherry was acquired 22h-28h post transfection at 80 ms per frame using  
 800 alternating 2-color excitation. The eGFP species were excited during 20 ms at 488 nm (0.75% power,  
 801  $\sim 330 \mu\text{W}$ ), followed by 20 ms excitation of the mCherry species at 561 nm (1.5% power,  $\sim 750 \mu\text{W}$ ). A  
 802 modified image correlation calculation was used to calculate the Pearson's correlation coefficient  $\rho$   
 803 and to check the specificity of  $\rho$  [44, 61]. Image masking was performed as for RICS analysis. The  $\rho$  of  
 804 the masked images was then calculated using:

$$\rho(\xi, \psi) = \frac{\langle \delta I_1(x, y) \cdot \delta I_2(x + \xi, y + \psi) \rangle}{\langle \sigma_1 \rangle \cdot \langle \sigma_2 \rangle} \quad (\text{Eq. 8})$$

805 The  $\rho(0,0)$  is the classical Pearson's coefficient,  $\rho \approx 1$  means green- and red-labeled containing  
806 molecular complexes are overlapping,  $\rho \approx 0$  means a random distribution and a value approaching -1  
807 would mean exclusion. For the Pearson's analysis, the same data as for fluctuation analysis was used,  
808 which contains significant shot noise. We therefore made an average of the first 5 image frames to  
809 obtain the most reliable Pearson's correlation analysis (Fig. S3H).

810

### 811 TICS and dual-color TICS

812 Sample preparation and TIRF image series recording was performed as described for the Pearson's co-  
813 localization analysis. In each pixel the time series are preprocessed to remove the frame-to-frame  
814 variation of intensity using [41]:

$$I_{TICS}(x, y, t) = I(x, y, t) - \langle I(t) \rangle_{XY} + \langle I \rangle_{XY} \quad (\text{Eq. 9})$$

815 where  $I(x, y, t)$  is the intensity of any pixel,  $\langle I(t) \rangle_{XY}$  is the mean intensity of frame  $t$  and  $\langle I \rangle_{XY}$  is the  
816 mean intensity over all frames. The region inside the cell membrane was selected via freehand-  
817 drawing. To exclude high-intensity clusters either dynamic (as described above for RICS) or static image  
818 masking was applied (Videos S3-S5). For static region-of-interest (ROI) selection thresholding occurred  
819 based on the average intensity of the whole time series. Pixel-based auto- and cross-correlations were  
820 calculated using a one-dimensional discrete Fourier transform algorithm [40, 49]:

$$G(x, y, \tau) = \frac{\langle \delta I_{TICS,1}(x, y, t) \delta I_{TICS,2}(x, y, t + \tau) \rangle}{\langle I_{TICS,1}(x, y) \rangle \langle I_{TICS,2}(x, y) \rangle} \quad (\text{Eq. 10})$$

821 where  $\tau$  is the time lag and  $\delta I_{TICS,1} = \delta I_{TICS,2}$  for autocorrelation of a single imaging channel, while  
822 for dual-color cross-correlation  $\delta I_{TICS,1}$  and  $\delta I_{TICS,2}$  are the values from the green and red image  
823 respectively. Finally, a one-component model for 2D diffusion was fitted to the autocorrelation  
824 functions (ACFs) and cross-correlation function (CCF) to obtain for each fit the average molecular  
825 diffusion coefficient,  $D$ :

$$G_{TICS}(\tau) = A_D \left( 1 + \frac{4D\tau}{\omega_r^2} \right)^{-1} + A_0 \quad (\text{Eq. 11})$$

826

827 where  $A_D$  is the amplitude of the decaying part of the correlation function,  $\omega_r$  is the radial waist of  
828 the point spread function (PSF) inherent to the resolution of the used microscope (Fig. S4A) and  $A_0$  is  
829 the offset caused by e.g. immobile molecules. To avoid influence of very slow motion (e.g. cell drift),  
830 the data was fitted until a 12-frame lag (i.e.,  $\sim 1$  s). The relative cross-correlation was obtained by  
831 dividing the amplitude of the cross-correlation function at the center by the mean of the two  
832 amplitudes of the corresponding autocorrelation functions.

$$Rel. CC = \frac{G_{fit,CCF}(0)}{(G_{fit,ACF1}(0) + G_{fit,ACF2}(0))/2} \quad (\text{Eq. 12})$$

833

#### 834 Whole-cell patch-clamp electrophysiology

835 Cells were transfected with either GlyR- $\alpha$ 3L-eGFP, GlyR- $\alpha$ 3K-eGFP or GlyR- $\alpha$ 3K-mCherry. Recordings  
836 were performed at room temperature in voltage-clamp mode using a HEKA EPC10 amplifier (HEKA  
837 Electronics, Lambrecht, Germany) controlled by HEKA acquisition software. Patch pipettes (3-4 M $\Omega$ )  
838 were filled with internal solution containing 120 mM CsCl, 2 mM Na<sub>2</sub>ATP, 2 mM MgATP, 10 mM EGTA  
839 and 10 mM HEPES, adjusted to pH 7.2 with CsOH. The standard external solution (SES) had a  
840 composition of 150 mM NaCl, 5.4 mM KCl, 2 mM CaCl<sub>2</sub>, 1 mM MgCl<sub>2</sub>, 10 mM glucose and 10 mM  
841 HEPES. Glycinergic currents were recorded at a holding potential  $V_H = -60$  mV. Different glycine  
842 concentrations in SES including 20  $\mu$ M, 50  $\mu$ M, 100  $\mu$ M, 200  $\mu$ M, 500  $\mu$ M were applied during 10 s.  
843 Maximum current amplitude was measured using FitMaster software (HEKA Electronics). The EC<sub>50</sub> was  
844 calculated by plotting the normalized current as a function of concentration and fitting the data with  
845 the Hill equation (GraphPad Prism, La Jolla, CA, USA). For desensitization analysis, the decaying current  
846 phase was fitted using a mono-exponential in FitMaster software (HEKA Electronics, Lambrecht,  
847 Germany).

848

#### 849 On-cell single-channel electrophysiology

850 Cells were transfected with either GlyR- $\alpha$ 3L-eGFP, GlyR- $\alpha$ 3K-mCherry or both GlyR- $\alpha$ 3L-eGFP and GlyR-  
851  $\alpha$ 3K-mCherry. On-cell recordings were performed in voltage clamp mode at RT using a HEKA EPC10  
852 amplifier. The external solution contained 120 mM NaCl, 4.7 mM KCl, 2 mM CaCl<sub>2</sub>, 1.2 mM MgCl<sub>2</sub>,  
853 10 mM HEPES, 14 mM glucose, 20 mM TEA-Cl, 15 mM sucrose, adjusted to a pH of 7.4 with NaOH.  
854 Patch pipettes (5 – 15 M $\Omega$ ) were filled with external solution and 30 – 80  $\mu$ M glycine. The holding  
855 potential was set at +60 mV. Analysis of on-cell recordings was done using the FitMaster software.  
856 Amplitude histograms from single-channel openings were made by manually selecting single-channel  
857 opening events with a constant baseline. Histograms were fit with a gaussian fit yielding a mean open  
858 amplitude for the event. A histogram was made from all amplitudes in which the most frequently  
859 occurring conductance states were identified and fit with a gaussian.

860

#### 861 Summary of the Supplemental material

862 Fig. S1 shows the immunocytochemistry of the FP tagged GlyR. Fig. S2 illustrates the functional  
863 assessment of fluorescent protein tagged GlyR via electrophysiology, and shows the electrophysiology  
864 setup. Fig. S3 shows additional and control image correlation spectroscopy experiments. Fig. S4 shows  
865 focus size determination measurements of the Zeiss Elyra PS.1 and LSM880 microscopes. The  
866 supplementary tables include diffusion coefficients of the GlyR with frame-based thresholding (Table  
867 S1) and with average intensity-based thresholding (Table S2). Table S3 gives Pearson's correlation

868 coefficients to determine co-localization of GlyR- $\alpha$ 3L and GlyR- $\alpha$ 3K. Parameters obtaining from the  
869 bleaching histograms fits are in Table S4. Brightness of eGFP tagged proteins can be found in Table S5.

870 **Acknowledgements**

871 We are greatly indebted to Mrs. Petra Bex and Dr. Sam Duwé for expert assistance with  
872 electrophysiology and microscopy, respectively. Prof. Em. Marcel Ameloot is thanked for critically  
873 reviewing the manuscript. Prof. Gonzalo E. Yevenes and Prof. Gustavo Morage-Cid (Department of  
874 Physiology, Faculty of Biological Sciences, University of Concepción, Concepción, Chile) are thanked for  
875 constructive discussions on the patch clamp experiments. Supervised students Hanneke Schroyen,  
876 Mahnoor Arif, Sam Vanspauwen and Jolien Broekmans are acknowledged for assistance in conducting  
877 experiments.

878



879 **References**

- 880 1. Dutertre S, Becker C-M, Betz H. Inhibitory Glycine receptors: An update. *The journal of biological*  
881 *Chemistry*. 2012;287(48):40216-23.
- 882 2. Lynch JW, Zhang Y, Talwar S, Estrada-Mondragon A. Glycine Receptor Drug Discovery. *Advances in*  
883 *Pharmacology*. Elsevier; 2017. p. 225-53.
- 884 3. Nikolic Z, Laube B, Weber RG, Lichter P, Kioschis P, Poustka A, et al. The human glycine receptor  
885 subunit  $\alpha 3$ . *Journal of Biological Chemistry*. 1998;273(31):19708-14.
- 886 4. Uhlén M, Fagerberg L, Hallström BM, Lindskog C, Oksvold P, Mardinoglu A, et al. Tissue-based map  
887 of the human proteome. *Science*. 2015;347(6220).
- 888 5. Eichler S, Förstera B, Smolinsky B, Jüttner R, Lehmann T-N, Fähling M, et al. Splice-specific roles of  
889 glycine receptor  $\alpha 3$  in the hippocampus. *European Journal of Neuroscience*. 2009;30:1077-91.
- 890 6. Winkelmann A, Maggio N, Eller J, Callskan G, Semtner M, Häussler U, et al. Changes in neural network  
891 homeostasis trigger neuropsychiatric symptoms. *The Journal of Clinical investigation* 2014;124:696-  
892 711.
- 893 7. Çalışkan G, Müller I, Semtner M, Winkelmann A, Raza AS, Hollnagel JO, et al. Identification of  
894 parvalbumin interneurons as cellular substrate of fear memory persistence. *Cerebral Cortex*.  
895 2016;26(5):2325-40.
- 896 8. Eichler SA, Kirischuk S, Jüttner R, Schafermeier PK, Legendre P, Lehmann TN, et al. Glycinergic tonic  
897 inhibition of hippocampal neurons with depolarizing GABAergic transmission elicits histopathological  
898 signs of temporal lobe epilepsy. *Journal of cellular and molecular medicine*. 2008;12(6b):2848-66.
- 899 9. Harvey RJ, Depner UB, Wässle H, Ahmadi S, Heindl C, Reinold H, et al. GlyR  $\alpha 3$ : An Essential Target  
900 for Spinal PGE<sub>2</sub>-Mediated Inflammatory Pain Sensitization. *Science*. 2004;304:884-7.
- 901 10. Malosio ML, Grenningloh G, Kuhse J, Schmieden V, Schmitt B, Prior P, et al. Alternative splicing  
902 generates two variants of the alpha 1 subunit of the inhibitory glycine receptor. *Journal of Biological*  
903 *Chemistry*. 1991;266(4):2048-53.
- 904 11. Kuhse J, Kuryatov A, Maulet Y, Malosio M, Schmieden V, Betz H. Alternative splicing generates two  
905 isoforms of the  $\alpha 2$  subunit of the inhibitory glycine receptor. *FEBS letters*. 1991;283(1):73-7.
- 906 12. Oertel J, Villmann C, Kettenmann H, Kirchhoff F, Becker C-M. A Novel Glycine Receptor  $\beta$  Subunit  
907 Splice Variant Predicts an Unorthodox Transmembrane Topology ASSEMBLY INTO HETEROMERIC  
908 RECEPTOR COMPLEXES. *Journal of Biological Chemistry*. 2007;282(5):2798-807.
- 909 13. Zhang L-H, Gong N, Fei D, Xu L, Xu T-L. Glycine uptake regulates hippocampal network activity via  
910 glycine receptor-mediated tonic inhibition. *Neuropsychopharmacology*. 2008;33(3):701-11.
- 911 14. Meier JC, Semtner M, Winkelmann A, Wolfart J. Presynaptic mechanisms of neuronal plasticity and  
912 their role in epilepsy. *Frontiers in cellular neuroscience*. 2014;8:164.
- 913 15. Waseem TV, Fedorovich SV. Presynaptic glycine receptors influence plasma membrane potential  
914 and glutamate release. *Neurochemical research*. 2010;35(8):1188-95.
- 915 16. Kubota H, Alle H, Betz H, Geiger JR. Presynaptic glycine receptors on hippocampal mossy fibers.  
916 *Biochemical and biophysical research communications*. 2010;393(4):587-91.
- 917 17. Ruiz A, Campanac E, Scott RS, Rusakov DA, Kullmann DM. Presynaptic GABA A receptors enhance  
918 transmission and LTP induction at hippocampal mossy fiber synapses. *Nature neuroscience*.  
919 2010;13(4):431.
- 920 18. Prior P, Schmitt B, Grenningloh G, Pribilla I, Multhaup G, Beyreuther K, et al. Primary structure and  
921 alternative splice variants of gephyrin, a putative glycine receptor-tubulin linker protein. *Neuron*.  
922 1992;8(6):1161-70.
- 923 19. Meyer G, Kirsch J, Betz H, Langosch D. Identification of a gephyrin binding motif on the glycine  
924 receptor  $\beta$  subunit. *Neuron*. 1995;15(3):563-72.
- 925 20. Notelaers K, Smisdom N, Rocha S, Janssen D, Meier JC, Rigo J-M, et al. Ensemble and single particle  
926 fluorimetric techniques in concerted action to study the diffusion and aggregation of the glycine  
927 receptor  $\alpha 3$  isoforms in the cell plasma membrane. *biochimica et Biophysica Acta*. 2012;1818:3131-  
928 40.

- 929 21. Notelaers K, Rocha S, Paesen R, Smisdom N, De Clercq B, Meier JC, et al. Analysis of  $\alpha 3$  GlyR single  
930 particle tracking in the cell membrane. *Biochimica et Biophysica Acta*. 2014;1843:544-53.
- 931 22. Notelaers K, Rocha S, Paesen R, Swinnen N, Vangindertael J, Meier JC, et al. Membrane distribution  
932 of the glycine receptor  $\alpha 3$  studied by optical super-resolution microscopy. *Histochem Cell Biol*.  
933 2014;142:79-90.
- 934 23. Patrizio A, Renner M, Pizzarelli R, Triller A, Specht C. Alpha subunit-dependent glycine receptor  
935 clustering and regulation of synaptic receptor numbers. *Scientific reports*. 2017;7(1):1-11.
- 936 24. Marabelli A, Moroni M, Lape R, Sivilotti LG. The kinetic properties of the  $\alpha 3$  rat glycine receptor  
937 make it suitable for mediating fast synaptic inhibition. *The Journal of physiology*. 2013;591(13):3289-  
938 308.
- 939 25. Breitingner HG, Villmann C, Rennert J, Ballhausen D, Becker CM. Hydroxylated residues influence  
940 desensitization behaviour of recombinant  $\alpha 3$  glycine receptor channels. *Journal of neurochemistry*.  
941 2002;83(1):30-6.
- 942 26. Acuña MA, Yévenes GE, Ralvenius WT, Benke D, Di Lio A, Lara CO, et al. Phosphorylation state-  
943 dependent modulation of spinal glycine receptors alleviates inflammatory pain *The Journal of Clinical*  
944 *investigation*. 2016;126(7):2547-60.
- 945 27. Lara CO, Murath P, Muñoz B, Marileo AM, San Martín L, San Martín VP, et al. Functional modulation  
946 of glycine receptors by the alkaloid gelsemine. *British journal of pharmacology*. 2016;173(14):2263-77.
- 947 28. Moraga-Cid G, San Martín VP, Lara CO, Muñoz B, Marileo AM, Sazo A, et al. Modulation of glycine  
948 receptor single-channel conductance by intracellular phosphorylation. *Scientific reports*. 2020;10(1):1-  
949 11.
- 950 29. Bormann J, Rundström N, Betz H, Langosch D. Residues within transmembrane segment M2  
951 determine chloride conductance of glycine receptor homo-and hetero-oligomers. *The EMBO Journal*.  
952 1993;12(10):3729-37.
- 953 30. Schwille P, Meyer-Almes F-J, Rigler R. Dual-color fluorescence cross-correlation spectroscopy for  
954 multicomponent diffusional analysis in solution. *Biophys J*. 1997;72(4):1878-86.
- 955 31. Digman MA, Wiseman PW, Horwitz AR, Gratton E. Detecting protein complexes in living cells from  
956 laser scanning confocal image sequences by the cross correlation raster image spectroscopy method.  
957 *Biophys J*. 2009;96(2):707-16.
- 958 32. McGuire H, Arousseau MR, Bowie D, Blunck R. Automating single subunit counting of membrane  
959 proteins in mammalian cells. *Journal of Biological Chemistry*. 2012;287(43):35912-21.
- 960 33. Ulbrich MH, Isacoff EY. Subunit counting in membrane-bound proteins. *Nature methods*.  
961 2007;4(4):319-21.
- 962 34. Watanabe N, Mitchison TJ. Single-molecule speckle analysis of actin filament turnover in  
963 lamellipodia. *Science*. 2002;295(5557):1083-6.
- 964 35. Groot-Kormelink PJ, Beato M, Finotti C, Harvey RJ, Sivilotti LG. Achieving optimal expression for  
965 single channel recording: a plasmid ratio approach to the expression of  $\alpha 1$  glycine receptors in HEK293  
966 cells. *Journal of neuroscience methods*. 2002;113(2):207-14.
- 967 36. Wong K, Briddon SJ, Holliday ND, Kerr ID. Plasma membrane dynamics and tetrameric organisation  
968 of ABCG2 transporters in mammalian cells revealed by single particle imaging techniques. *Biochimica*  
969 *et Biophysica Acta (BBA)-Molecular Cell Research*. 2016;1863(1):19-29.
- 970 37. Brown C, Dalal R, Hebert B, Digman M, Horwitz A, Gratton E. Raster image correlation spectroscopy  
971 (RICS) for measuring fast protein dynamics and concentrations with a commercial laser scanning  
972 confocal microscope. *Journal of microscopy*. 2008;229(1):78-91.
- 973 38. Digman MA, Brown CM, Sengupta P, Wiseman PW, Horwitz AR, Gratton E. Measuring fast dynamics  
974 in solutions and cells with a laser scanning microscope. *Biophys J*. 2005;89(2):1317-27.
- 975 39. Digman MA, Sengupta P, Wiseman PW, Brown CM, Horwitz AR, Gratton E. Fluctuation correlation  
976 spectroscopy with a laser-scanning microscope: exploiting the hidden time structure. *Biophys J*.  
977 2005;88(5):L33-L6.
- 978 40. Wiseman P, Squier J, Ellisman M, Wilson K. Two-photon image correlation spectroscopy and image  
979 cross-correlation spectroscopy. *Journal of microscopy*. 2000;200(1):14-25.

- 980 41. Hendrix J, Baungärtel V, Schrimpf W, Ivanchenko S, Digman MA, Gratton E, et al. Live-cell  
981 observation of cytosolic HIV-1 assembly onset reveals RNA-interacting Gag oligomers. *J Cell Biol.*  
982 2015;210(4):629-49.
- 983 42. Longfils M, Smisdom N, Ameloot M, Rudemo M, Lemmens V, Fernández GS, et al. Raster Image  
984 Correlation Spectroscopy Performance Evaluation. *Biophysical journal.* 2019;117(10):1900-14.
- 985 43. Kolin DL, Costantino S, Wiseman PW. Sampling effects, noise, and photobleaching in temporal  
986 image correlation spectroscopy. *Biophysical journal.* 2006;90(2):628-39.
- 987 44. Manders E, Stap J, Brakenhoff G, Van Driel R, Aten J. Dynamics of three-dimensional replication  
988 patterns during the S-phase, analysed by double labelling of DNA and confocal microscopy. *Journal of*  
989 *cell science.* 1992;103(3):857-62.
- 990 45. Bolte S, Cordelières FP. A guided tour into subcellular colocalization analysis in light microscopy.  
991 *Journal of microscopy.* 2006;224(3):213-32.
- 992 46. Dunn KW, Kamocka MM, McDonald JH. A practical guide to evaluating colocalization in biological  
993 microscopy. *American Journal of Physiology-Cell Physiology.* 2011;300(4):C723-C42.
- 994 47. Hendrix J, Gijsbers R, De Rijck J, Voet A, Hotta J-i, McNeely M, et al. The transcriptional co-activator  
995 LEDGF/p75 displays a dynamic scan-and-lock mechanism for chromatin tethering. *Nucleic acids*  
996 *research.* 2011;39(4):1310-25.
- 997 48. Schrimpf W, Lemmens V, Smisdom N, Ameloot M, Lamb DC, Hendrix J. Crosstalk-free multicolor  
998 RICS using spectral weighting. *Methods.* 2018;140:97-111.
- 999 49. Srivastava M, Petersen NO. Diffusion of transferrin receptor clusters. *Biophys Chem.*  
1000 1998;75(3):201-11.
- 1001 50. Hendrix J, Dekens T, Schrimpf W, Lamb DC. Arbitrary-Region Raster Image Correlation  
1002 Spectroscopy. *Biophys J.* 2016;111:1-12.
- 1003 51. Fogarty KH, Chen Y, Grigsby IF, Macdonald PJ, Smith EM, Johnson JL, et al. Characterization of  
1004 cytoplasmic Gag-gag interactions by dual-color z-scan fluorescence fluctuation spectroscopy.  
1005 *Biophysical journal.* 2011;100(6):1587-95.
- 1006 52. Vercaemmen J, Maertens G, Gerard M, De Clercq E, Debyser Z, Engelborghs Y. DNA-induced  
1007 polymerization of HIV-1 integrase analyzed with fluorescence fluctuation spectroscopy. *Journal of*  
1008 *Biological Chemistry.* 2002;277(41):38045-52.
- 1009 53. Lemmens V, Ramanathan K, Hendrix J. Fluorescence microscopy data for quantitative mobility and  
1010 interaction analysis of proteins in living cells. *Data in brief.* 2020:105348.
- 1011 54. Gambin Y, Lopez-Esparza R, Reffay M, Sierrecki E, Gov N, Genest M, et al. Lateral mobility of proteins  
1012 in liquid membranes revisited. *Proceedings of the National Academy of Sciences.* 2006;103(7):2098-  
1013 102.
- 1014 55. Naji A, Levine AJ, Pincus PA. Corrections to the Saffman-Delbrück mobility for membrane bound  
1015 proteins. *Biophysical journal.* 2007;93(11):L49-L51.
- 1016 56. Choquet D. Fast AMPAR trafficking for a high-frequency synaptic transmission. *European Journal*  
1017 *of Neuroscience.* 2010;32(2):250-60.
- 1018 57. Weltzien F, Puller C, O'Sullivan GA, Paarman I, Betz H. Distribution of the glycine receptor  $\beta$ -  
1019 subunit in the mouse CNS as revealed by a novel monoclonal antibody. *Journal of Comparative*  
1020 *Neurology.* 2012;520(17):3962-81.
- 1021 58. Meier J, Grantyn R. A gephyrin-related mechanism restraining glycine receptor anchoring at  
1022 GABAergic synapses. *Journal of Neuroscience.* 2004;24(6):1398-405.
- 1023 59. Durisic N, Godin AG, Wever CM, Heyes CD, Lakadamyali M, Dent JA. Stoichiometry of the Human  
1024 Glycine receptor revealed by direct subunit counting. *The Journal of Neuroscience.* 2012;32:12915-20.
- 1025 60. Schaefer N, Roemer V, Janzen D, Villmann C. Impaired Glycine receptor trafficking in neurological  
1026 diseases. *Frontiers in Molecular Neuroscience.* 2018;11:291.
- 1027 61. van Steensel B, van Binnendijk EP, Hornsby CD, Van der Voort H, Krozowski ZS, de Kloet ER, et al.  
1028 Partial colocalization of glucocorticoid and mineralocorticoid receptors in discrete compartments in  
1029 nuclei of rat hippocampus neurons. *Journal of cell science.* 1996;109(4):787-92.

- 1030 62. Förstera B, Dzaye OD, Winkelmann A, Semtner M, Benedetti B, Markovic DS, et al. Intracellular  
1031 glycine receptor function facilitates glioma formation in vivo. *Journal of Cell Science*.  
1032 2014;127(17):3687-98.
- 1033 63. Kluba M, Engelborghs Y, Hofkens J, Mizuno H. Inhibition of receptor dimerization as a novel  
1034 negative feedback mechanism of EGFR signaling. *PLoS One*. 2015;10(10):e0139971.
- 1035 64. Pack C, Saito K, Tamura M, Kinjo M. Microenvironment and effect of energy depletion in the  
1036 nucleus analyzed by mobility of multiple oligomeric EGFPs. *Biophysical journal*. 2006;91(10):3921-36.
- 1037 65. Chen C, Okayama H. High-efficiency transformation of mammalian cells by plasmid DNA. *Molecular*  
1038 *and cellular biology*. 1987;7(8):2745-52.
- 1039 66. Liebsch F, Arousseau MR, Bethge T, McGuire H, Scolari S, Herrmann A, et al. Full-length cellular  $\beta$ -  
1040 secretase has a trimeric subunit stoichiometry, and its sulfur-rich transmembrane interaction site  
1041 modulates cytosolic copper compartmentalization. *Journal of Biological Chemistry*.  
1042 2017;292(32):13258-70.
- 1043 67. Dusing V, Luckner M, Zühlke B, Petazzi RA, Herrmann A, Chiantia S. Optimal fluorescent protein  
1044 tags for quantifying protein oligomerization in living cells. *Scientific reports*. 2018;8(1):1-12.
- 1045 68. Godin AG, Rappaz B, Potvin-Trottier L, Kennedy TE, De Koninck Y, Wiseman PW. Spatial intensity  
1046 distribution analysis reveals abnormal oligomerization of proteins in single cells. *Biophysical journal*.  
1047 2015;109(4):710-21.
- 1048 69. Arant RJ, Ulbrich MH. Deciphering the subunit composition of multimeric proteins by counting  
1049 photobleaching steps. *ChemPhysChem*. 2014;15(4):600-5.
- 1050 70. Hines KE. Inferring subunit stoichiometry from single molecule photobleaching. *Journal of General*  
1051 *Physiology*. 2013;141(6):737-46.
- 1052 71. Schimpf W, Barth A, Hendrix J, Lamb DC. PAM: A framework for integrated analysis of imaging,  
1053 single-molecule, and ensemble fluorescence data. *Biophysical journal*. 2018;114(7):1518-28.
- 1054 72. METS RD, Delon A, Balland M, Destaing O, Wang I. Dynamic range and background filtering in raster  
1055 image correlation spectroscopy. *Journal of Microscopy*. 2020.
- 1056 73. Ivanchenko S, Lamb DC. Fluorescence correlation spectroscopy: principles and developments.  
1057 *Supramolecular Structure and Function 10*. Springer, Dordrecht; 2011. p. 1-30.
- 1058
